# Supplementary material
Source: PubMed Central journal article supplement (PMC8510644)

# THE LANCET Microbe

## Supplementary appendix

This appendix formed part of the original submission and has been peer reviewed. We post it as supplied by the authors.

Supplement to: Au WY, Cheung PPH. Diagnostic performances of common nucleic acid tests for SARS-CoV-2 in hospitals and clinics: a systematic review and meta-analysis. *Lancet Microbe* 2021; published online Oct 12. [https://doi.org/10.1016/S2666-5247\(21\)00214-7](https://doi.org/10.1016/S2666-5247(21)00214-7)

## Supplementary appendix

### Diagnostic Performances of Common Nucleic Acid Tests for COVID-19 in Hospitals and Clinics: A Systematic Review and Meta-analysis

Wing Ying Au<sup>a,b,c</sup>, BSc, Pak Hang Peter Cheung<sup>a,b,c</sup>, PhD

<sup>a</sup>Li Ka Shing Institute of Health Sciences, The Chinese University of Hong Kong, Shatin, New Territories, Hong Kong SAR, China

<sup>b</sup>Department of Chemical Pathology, The Chinese University of Hong Kong, Shatin, New Territories, Hong Kong SAR, China

<sup>c</sup>Department of Chemistry, Hong Kong University of Science and Technology, Clear Water Bay, Kowloon, Hong Kong SAR

\*To whom correspondence may be addressed. Email: ppcheung@cuhk.edu.hk, Room 306F, Li Ka Shing Institute of Health Sciences, The Chinese University of Hong Kong, Shatin, New Territories, Hong Kong SAR, China, Tel: (852) 37636049

**Supplementary Table 1.** Summary of content of 66 studies

**Supplementary Table 2.** Primary subgroup analysis for LAMP, dPCR, and qPCR assays using bivariate latent class model

**Supplementary Table 3.** dAUC and P values of LAMP, dPCR, and qPCR

**Supplementary Table 4.** Sensitivity, specificity, and DOR in secondary subgroup analysis by clustering

**Supplementary Table 5.** Summary of primer-probe sets for 66 studies

**Supplementary Table 6.** Summary of index tests and reference tests of all included studies

**Supplementary Figure 1a-c.** Forest plots of LAMP, dPCR, and qPCR

**Supplementary Figure 2.** Galaxy plots of LAMP, dPCR, and qPCR studies to visualize heterogeneity

**Supplementary Figure 3.** Graph of methodological quality for the 66 studies

**Supplementary Table 1. Summary of content of 66 studies**

Total number of included studies = 66, total number of samples = 15,017 (both number of patients and samples generated from the same population).

Abbreviations: Chest CT, Chest computed tomography; CDC, Centers for Disease Control and Prevention; dPCR, digital polymerase chain reaction; LAMP, loop-mediated isothermal amplification; ORF, open reading frame; RdRp, RNA-dependent RNA polymerase; qPCR, quantitative polymerase chain reaction

| Study (N=66)            | Sample size | Test type                 | Target gene         | Specimen type                  | Patient type/ Subject                                           | Control                                                            | Measurement of concentration of genetic sequences in mixture                                                         | Extraction of RNA                                                                                                      | Choice of toolkit                                                                                   |
|-------------------------|-------------|---------------------------|---------------------|--------------------------------|-----------------------------------------------------------------|--------------------------------------------------------------------|----------------------------------------------------------------------------------------------------------------------|------------------------------------------------------------------------------------------------------------------------|-----------------------------------------------------------------------------------------------------|
| <b>Abasiyanik, 2020</b> | 166         | dPCR<br>qPCR              | N1<br>N2            | Nasal swabs<br>Saliva          | Inpatients(hospitalized), outpatients, asymptomatic individuals | Internal control<br>RnaseP gene                                    | Fluorescence read by QX200 reader - BioRad for dPCR; Ct values evaluated by CFX Maestro™ Software (Bio-Rad) for qPCR | RNA extraction by QIAamp MinElute Virus DNA/RNA Spin Kit (QVDRK) (Qiagen) and QIAamp Viral RNA Mini Kit (QVK) (Qiagen) | CFX384 Touch Real-time PCR detection system (Bio-Rad) for qPCR                                      |
| <b>Alteri, 2020</b>     | 55          | dPCR<br>qPCR<br>IgG assay | RdRp                | Nasopharyngeal swabs           | Patients confirmed with COVID-19                                | Negative control with 40 samples; Positive control with 60 samples | Fluorescence read in FAM and HEX channels for dPCR                                                                   | RNA extraction by QIAamp viral RNA mini kit                                                                            | GeneFinder™ COVID-19 Plus RealAmp Kit for qPCR; QX200™ BioRad for dPCR                              |
| <b>Cassinari, 2020</b>  | 130         | dPCR<br>qPCR              | ORF1ab<br>RdRp<br>N | Nasopharyngeal swabs<br>Saliva | Ambulatory patients with mild to moderate infection             | Unspecified                                                        | Fluorescence read by QX200 reader - BioRad for dPCR                                                                  | RNA extraction by EZ1 DSP 96 virus kit (Qiagen, Hilden, Germany) and EZ1 Advanced XL machine                           | RealStar® 97 SARS-CoV-2 RT-PCR Kit 1.0 for qPCR                                                     |
| <b>Dang, 2020</b>       | 117         | dPCR<br>qPCR              | ORF1ab<br>N         | Pharyngeal swabs<br>Sputum     | Patients confirmed with and without COVID-19                    | Positive control using a reference gene                            | Fluorescence read in FAM/VIC channels or Evagreen by chip reader, TargetingOne, Beijing for dPCR                     | RNA extraction by Nucleic acids extraction kit Lot. T124                                                               | TD-1™ Droplet Digital™ PCR System; SARS-CoV-2 detection kit, Biogerm Medical Biotechnology for qPCR |

|                       |     |                               |                  |                                 |                                                                              |                                                                                                                                |                                                                                                                                |                                                                                    |                                                                                                        |
|-----------------------|-----|-------------------------------|------------------|---------------------------------|------------------------------------------------------------------------------|--------------------------------------------------------------------------------------------------------------------------------|--------------------------------------------------------------------------------------------------------------------------------|------------------------------------------------------------------------------------|--------------------------------------------------------------------------------------------------------|
| <b>Deiana, 2020</b>   | 50  | Regular dPCR<br>One-step dPCR | N1<br>N2         | Nasopharyngeal swabs            | Universal Transport Medium<br>ESwab<br>Both collected from COVID-19 patients | Positive control<br>No template control                                                                                        | Fluorescence read in FAM and HEX channels by QX200 reader -BioRad for dPCR                                                     | RNA extraction by Nextractor NX-48 using the NX-48S Viral NA Kit (Genolution Inc.) | 2019-nCoV CDC dPCR triplex probe assay (dEXS28563542, Bio-Rad) for dPCR                                |
| <b>Dong, 2020</b>     | 146 | dPCR<br>qPCR                  | ORF1ab<br>N<br>E | Pharyngeal swabs                | Hospitalized Patients, close contacts and convalescents                      | Positive human reference control using RNasep in VIC channel                                                                   | Fluorescence read in FAM and VIC channels by QX200 reader -BioRad for dPCR                                                     | RNA extraction by MagMAX-96 viral RNA isolation kit                                | QX200™ BioRad for dPCR; kits from H&R, BioGerm Medical Biotechnology, Daan for qPCR                    |
| <b>Liu, 2020</b>      | 92  | dPCR<br>qPCR                  | N                | Feces<br>Sputum<br>Throat swabs | Recovering COVID-19 patients<br>Relapsed patients (secondary infection)      | Synthetic DNA fragment from the N gene as a positive control; ultrapure water as a negative template control; internal control | Fluorescence read in the VIC, ROX and CY5 channels by Droplet Digital PCR System (Pilot Gene Technologies (Hangzhou) Co., Ltd) | RNA extraction by Nucleic Acid Extraction Kit (Shanghai ZJ Bio-Tech Co., Ltd)      | Novel Coronavirus Real Time qPCR Kit (Shanghai ZJ Bio-Tech Co., Ltd) for qPCR                          |
| <b>Oberding, 2020</b> | 12  | dPCR<br>qPCR                  | E                | Saliva                          | Patients with post symptom-onset                                             | Positive control using 5 templates for dPCR<br>No template controls                                                            | Fluorescence read by (QX200™ Droplet Digital™ (dd) PCR system                                                                  | RNA extraction by Promega SV total RNA 64 (Promega Corp., Madison, WI)             | Unspecified toolkit for qPCR                                                                           |
| <b>Suo, 2020</b>      | 63  | dPCR<br>qPCR                  | ORF1ab<br>N      | Throat swabs                    | Outpatients and convalescents                                                | Positive control for both dPCR and qPCR using same primer/probe set                                                            | Fluorescence read in FAM and HEX channels by QX200 reader -BioRad for dPCR                                                     | RNA extraction by QIAamp viral RNA mini kit                                        | QX200™ Droplet Digital PCR System for dPCR; BioRad CFX96 Touch Real-Time PCR Detection system for qPCR |

|                        |     |              |                  |                                                                         |                                                                                                                                      |                                                |                                                                                                  |                                                                                                                 |                                                                                                                                                                                                                 |
|------------------------|-----|--------------|------------------|-------------------------------------------------------------------------|--------------------------------------------------------------------------------------------------------------------------------------|------------------------------------------------|--------------------------------------------------------------------------------------------------|-----------------------------------------------------------------------------------------------------------------|-----------------------------------------------------------------------------------------------------------------------------------------------------------------------------------------------------------------|
| <b>Y. Jiang, 2020</b>  | 32  | dPCR<br>qPCR | ORF1ab<br>N      | Pharyngeal swabs<br>Throat swabs<br>Phlegm<br>Plasma<br>Eye conjunctiva | Confirmed COVID-19 patients                                                                                                          | Unspecified                                    | Fluorescence emitted by TaqMan probes                                                            | RNA extraction by RNA release agent (Shengxiang, Hunan, China)                                                  | Droplet Digital PCR System (Changchun Technical Biotechnology Co., Ltd. Changchun, China) and the SARS-CoV-2 Nucleic Acid Detection Kit (Shanghai Rightongene Biotechnology Co., Ltd. Shanghai, China) for dPCR |
| <b>Yu, 2020</b>        | 323 | dPCR<br>qPCR | ORF1ab<br>N      | Nasopharyngeal swabs<br>Throat swabs<br>Sputum<br>Urine<br>Plasma       | Confirmed and suspected patients; patients showing respiratory symptoms but did not meet criteria for suspected cases; convalescents | Positive control using a reference gene        | Fluorescence read in FAM/VIC channels or Evagreen by chip reader, TargetingOne, Beijing for dPCR | RNA extraction by QIAamp viral RNA mini kit                                                                     | COVID-19 digital PCR detection kit (TargetingOne, Beijing, China) and TargetingOne Digital PCR System (CFDA) for dPCR; reaction system from BioGerm Medical Technology for qPCR                                 |
| <b>Altawalah, 2020</b> | 891 | qPCR         | ORF1ab<br>N<br>S | Nasopharyngeal swabs<br>Saliva                                          | Suspected COVID-19 patients                                                                                                          | Negative and positive controls                 | Fluorescence emitted by TaqMan probes                                                            | RNA extraction by MagMax Viral/Pathogen Nucleic Acid Isolation Kit (Thermo Fisher Scientific, Waltham, MA, USA) | TaqPath™ COVID-19 multiplex real-time RT-PCR test (Thermo Fisher Scientific, Waltham, MA, USA) for both index and reference qPCR tests                                                                          |
| <b>Anderson, 2020</b>  | 494 | qPCR         | N                | Nasopharyngeal swabs                                                    | Unspecified                                                                                                                          | Human specimen control using Rnase-P (RP) gene | Fluorescence emitted by TaqMan probes                                                            | RNA extraction by MagNA Pure 24 Total NA Isolation kit (Roche)                                                  | CDC RT-PCR COVID-19 assay using TaqPath 1-Step RT68 qPCR Master Mix, CG kit (Life Technologies) for both index and reference qPCR tests                                                                         |

|                      |     |             |                |                                                                         |                                                          |                                                                                                   |                                                                |                                                                                                                                                    |                                                                                                                                                                                             |
|----------------------|-----|-------------|----------------|-------------------------------------------------------------------------|----------------------------------------------------------|---------------------------------------------------------------------------------------------------|----------------------------------------------------------------|----------------------------------------------------------------------------------------------------------------------------------------------------|---------------------------------------------------------------------------------------------------------------------------------------------------------------------------------------------|
| <b>Barra, 2020</b>   | 63  | qPCR        | E<br>N<br>RdRP | Nasopharyngeal/ oropharyngeal swabs                                     | Unspecified                                              | Human specimen control using Rnase-P (RP) gene                                                    | Fluorescence emitted by TaqMan probes                          | RNA extraction by MagNA Pure 96 Instrument and MagNA Pure 96 DNA and Viral NA Small Volume Kit (protocol Viral NA Universal version 4.0)           | LightCycler 480 II on Flow Flex system                                                                                                                                                      |
| <b>Bruce, 2020</b>   | 155 | Direct qPCR | N1<br>N2<br>N3 | Nasopharyngeal swabs                                                    | Unspecified                                              | Internal control primer/probe set for detection of human RNase P                                  | Fluorescence emitted by TaqMan probes                          | RNA extraction by QIAamp Viral RNA Mini Kit (Qiagen, Cat. No. 52904) and Roche MagNA Pure 96 platform (Roche Lifesciences) for reference test only | NEB Luna Universal Probe One-Step RT-qPCR Kit<br>Thermo Fisher TaqPath 1-Step RT-qPCR Master Mix, CG<br>AgPath-ID One-Step RT-PCR kit                                                       |
| <b>Chan, 2020</b>    | 273 | qPCR        | RdRp<br>N<br>S | Pharyngeal swabs<br>Saliva<br>Sputum<br>Plasma<br>Urine<br>Rectal swabs | Confirmed COVID patients                                 | Positive controls                                                                                 | Fluorescence emitted by sequence-specific probes               | RNA extraction by NucliSENS easyMAG extraction system (bioMérieux, Marcy-l'Étoile, France)                                                         | QuantiNova Probe RT-PCR kit (Qiagen) in a LightCycler 480 real-time PCR system (Roche, Basel, Switzerland) for both index and reference qPCR tests                                          |
| <b>Dorlass, 2020</b> | 63  | qPCR        | E              | Pharyngeal swabs                                                        | Symptomatic patients and Asymptomatic healthcare workers | Positive controls using clinical isolated in Vero-E6 cell culture<br>Negative control using water | SYBR Green for index PCR test<br>TaqMan for reference PCR test | RNA extraction by NucliSens easyMag® platform (BioMérieux, Lyon, France)                                                                           | QuantiFast SYBR® Green RT-PCR kit (QIAGEN, Hilden, Germany) for index qPCR test<br>one-step protocol used the Pyromark OneStep RT-PCR kit (QIAGEN, Hilden, Germany) for reference qPCR test |

|                     |     |             |                   |                                   |                                       |                                                                                     |                                                                                                                                                                  |                                                                                                 |                                                                                                                                         |
|---------------------|-----|-------------|-------------------|-----------------------------------|---------------------------------------|-------------------------------------------------------------------------------------|------------------------------------------------------------------------------------------------------------------------------------------------------------------|-------------------------------------------------------------------------------------------------|-----------------------------------------------------------------------------------------------------------------------------------------|
| <b>Freire, 2020</b> | 54  | qPCR        | N1<br>N2          | Nasopharyngeal swabs              | Suspected COVID-19 patients           | Positive controls using 2019-nCoV N (IDT, USA)                                      | Unspecified probe type                                                                                                                                           | RNA extraction by CFX96 BioRad instrument and PureLink Viral RNA/DNA Mini Kit (Invitrogen, USA) | nCoV-QS (MiCo BioMed) kit for index qPCR test<br>2019-nCoV CDC EUA kits for reference qPCR test                                         |
| <b>Garcia, 2020</b> | 172 | qPCR        | N1<br>N2          | Nasopharyngeal swabs              | Unspecified                           | Positive control using commercial 2019-nCoV N<br>Negative controls (TE pH 8 buffer) | Fluorescence emitted by TaqMan probes                                                                                                                            | RNA extraction by AccuPrep Viral RNA extraction kit (Bioneer, South Korea)                      | TaqMan Fast Virus 1-Step Master Mix (Applied Biosystems, USA) and CFX96 thermal cycler (BioRad) for both index and reference qPCR tests |
| <b>Hasan, 2020</b>  | 132 | Direct qPCR | E                 | Nasopharyngeal swabs              | Unspecified                           | Internal control using MS2 bacteriophage template                                   | RNA concentration measured by using Qubit® RNA HS (High Sensitivity) Assay Kits (Thermo Scientific™) on an Invitrogen Qubit® 4 Fluorometer (Thermo Scientific™). | RNA extraction by NucliSENS1 easyMAG platform (bioMe´rieux, France)                             | SARS-CoV-2 RT-qPCR with TaqPath™ 1-Step RT-qPCR kit for both index and reference qPCR tests                                             |
| <b>Jung, 2020</b>   | 15  | qPCR        | N<br>ORF1<br>RdRP | Upper respiratory tract specimens | COVID-19 patients<br>Healthy subjects | Unspecified                                                                         | RNA concentration measured by Quantus Fluorometer (Promega, Madison, WI, USA)                                                                                    | RNA extraction by QIAamp viral RNA extraction kit (Qiagen, Hilden, Germany)                     | CFX 96 touch real-time PCR detection system (Bio-Rad, Hercules, CA, USA)                                                                |

|                     |     |              |        |                                   |                                |                                                                                                                                                                                                                                     |                                                  |                                                                                                                                                                            |                                                                                                                                                                                                   |
|---------------------|-----|--------------|--------|-----------------------------------|--------------------------------|-------------------------------------------------------------------------------------------------------------------------------------------------------------------------------------------------------------------------------------|--------------------------------------------------|----------------------------------------------------------------------------------------------------------------------------------------------------------------------------|---------------------------------------------------------------------------------------------------------------------------------------------------------------------------------------------------|
| <b>Kandel, 2020</b> | 432 | qPCR         | E      | Nasopharyngeal swabs<br>Saliva    | Outpatients                    | Armored RNA internal control                                                                                                                                                                                                        | Fluorescence emitted by TaqMan probes            | RNA extraction by BD MAX <sup>TM</sup> system using the ExK TNA-2 strip (Becton, Dickinson, ND, USA)                                                                       | CFX96 Touch Real-time PCR detection system (BioRad, Canada) for nasopharyngeal swabs<br>Roche cobas <sup>®</sup> SARS-CoV-2 assay (Hoffmann-La Roche Limited, Mississauga, ON, Canada) for saliva |
| <b>Klein, 2020</b>  | 77  | qPCR<br>LAMP | E<br>N | Upper respiratory tract specimens | Positive and negative patients | Internal control                                                                                                                                                                                                                    | Unspecified                                      | RNA extraction by SiMAG-N-DNA magnetic beads (Chemical, Berlin, Germany) in 96 deep-well plate format for index test<br>QIAamp Viral RNA body fluid kit for reference test | LightCycler <sup>®</sup> Multiplex RNA VirusMaster kit, Berlin, Germany for qPCR<br>WarmStart <sup>®</sup> Colorimetric LAMP 2X Master Mix M1800 (New England Biolabs, Ipswich, MA, USA) for LAMP |
| <b>Konrad, 2020</b> | 73  | qPCR         | E      | Nasopharyngeal swabs or sputum    | Patients and contact persons   | Positive controls using Wuhan coronavirus 2019 E gene and SARS-CoV Frankfurt 1 genomic RNA, negative extraction and no-template controls<br>LightMix Modular Wuhan CoV RdRP-gene (TibMolbiol, Berlin, Germany) for SARS-CoV-2 assay | Fluorescence emitted by sequence-specific probes | Unspecified RNA extraction kit                                                                                                                                             | RealStar SARS-CoV-2 RT-PCR kit 1.0 (Altona, Hamburg, Germany) for both index and reference qPCR tests                                                                                             |



|                               |     |             |                     |                                                                                              |                            |                                                                              |                                                  |                                                                                                                   |                                                                                                                                    |
|-------------------------------|-----|-------------|---------------------|----------------------------------------------------------------------------------------------|----------------------------|------------------------------------------------------------------------------|--------------------------------------------------|-------------------------------------------------------------------------------------------------------------------|------------------------------------------------------------------------------------------------------------------------------------|
| <b>Lübke, 2020</b>            | 91  | Direct qPCR | E                   | Pharyngeal swabs<br>Tracheal secretion<br>Bronchoalveolar lavage fluid<br>Aspirate<br>Saliva | Unspecified                | Internal control using synthetic plasmid coding for s-Antigen of Hepatitis B | Fluorescence emitted by TaqMan probes            | Not required for direct PCR<br>RNA extraction by MagNA Pure 96 system (Roche, Penzberg, Germany) for in-house PCR | In-house qPCR with the protocol by Corman and colleagues OR cobas® SARS-CoV-2 test (Roche) for both index and reference qPCR tests |
| <b>McCormick-Baw, 2020</b>    | 156 | qPCR        | N2<br>E             | Nasopharyngeal swabs<br>Saliva                                                               | Positive COVID-19 patients | Internal controls                                                            | Fluorescence signal from the probes              | Unspecified RNA extraction kit                                                                                    | Cepheid Xpert Xpress SARS-CoV-2 (Sunnyvale, CA) for index qPCR test                                                                |
| <b>Merindol, 2020</b>         | 88  | qPCR        | N<br>E<br>S<br>RdRp | Pharyngeal swabs                                                                             | Unspecified                | Internal controls                                                            | Fluorescence emitted by sequence-specific probes | RNA extraction by following the standard Altona method and the SeeGene protocol                                   | RealStar® 76 SARS-CoV-2 RT-PCR Kit RUO for index qPCR test<br>SeeGene Allplex™ 78 2019-nCoV RT-QPCR Assay for reference qPCR test  |
| <b>Moreno-Contreras, 2020</b> | 253 | qPCR        | E                   | Pharyngeal swabs<br>Saliva                                                                   | Ambulatory patients        | Internal controls using human RNase P gene                                   | Fluorescence emitted by sequence-specific probes | RNA extraction by QIAamp viral RNA mini kit                                                                       | StarQ One-Step RT-qPCR (Genes 2 Life) kit for both index and reference qPCR tests                                                  |

|                        |      |      |                        |                      |             |                                                                                               |                                       |                                                                                                                  |                                                                                                                       |
|------------------------|------|------|------------------------|----------------------|-------------|-----------------------------------------------------------------------------------------------|---------------------------------------|------------------------------------------------------------------------------------------------------------------|-----------------------------------------------------------------------------------------------------------------------|
| <b>Perchetti, 2020</b> | 356  | qPCR | N1<br>N2               | Nasopharyngeal swabs | Unspecified | Internal controls using EXO (a 130-base RNA transcript derived from jellyfish DNA)            | Fluorescence emitted by TaqMan probes | RNA extraction by Roche's MagNA Pure 96 instrument                                                               | AgPath-ID One-Step RT-PCR Kit (Life Technologies, Carlsbad, CA) for both index and reference qPCR tests               |
| <b>Pujadas, 2020</b>   | 1006 | qPCR | ORF1a<br>E<br>N1<br>N2 | Nasopharyngeal swabs | Unspecified | Internal controls using human RNase P gene                                                    | Unspecified probe type                | RNA extraction by QIAamp Viral RNA Mini Kit (Qiagen) for laboratory developed test or EZ1 DSP Virus Kit (Qiagen) | QuantiFast Pathogen RT-PCR Kit (Qiagen) in a LightCycler 480 II (Roche) for both index and reference qPCR tests       |
| <b>Ranoa, 2020</b>     | 100  | qPCR | N1<br>N2               | Saliva               | Unspecified | Internal controls using MS2 bacteriophage                                                     | Fluorescence emitted by TaqMan probes | RNA extraction kit for reference test unspecified                                                                | TaqPath/MasterMix qPCR for reference qPCR test                                                                        |
| <b>Ratcliff, 2020</b>  | 43   | qPCR | N<br>RdRp              | Nasopharyngeal swabs | Unspecified | Synthetic controls including SARS-CoV-2 RNA Control 1 - MT007544.1 and Control 2 - MN908947.3 | Unspecified probe type                | RNA extraction by Qiasymphony DSP virus/pathogen minikit                                                         | Applied Biosystems StepOnePlus Real-Time PCR System (ThermoFisher Scientific) for both index and reference qPCR tests |

|                       |     |             |                  |                                   |                                                     |                                                  |                                                                                                        |                                                                                                                         |                                                                                                                          |
|-----------------------|-----|-------------|------------------|-----------------------------------|-----------------------------------------------------|--------------------------------------------------|--------------------------------------------------------------------------------------------------------|-------------------------------------------------------------------------------------------------------------------------|--------------------------------------------------------------------------------------------------------------------------|
| <b>Sun, 2020</b>      | 564 | qPCR        | ORF1ab<br>N<br>E | Nasopharyngeal<br>swabs<br>Saliva | positive COVID<br>patients                          | Internal controls<br>using human<br>RNase P gene | Fluorescence emitted by sequence-specific probes                                                       | RNA extraction by<br>MGISP-960 or Thermo<br>PureLink™ Viral<br>RNA/DNA Mini Kit                                         | QuantiVirus™ SARS-CoV-2 Multiplex Test for index qPCR test<br>ABIQ55 qPCR instrument for reference qPCR test             |
| <b>Vaz, 2020</b>      | 155 | qPCR        | E<br>RdRp        | Pharyngeal<br>swabs<br>Saliva     | Symptomatic<br>healthcare workers<br>and inpatients | Protocol presented<br>in foreign language        | Protocol presented<br>in foreign language                                                              | RNA extraction by QIAGEN QIAamp®RNA Mini Kit                                                                            | BIOMOL OneStep/COVID-19 Kit (Paraná Molecular Biology Institute) protocol for both index and reference qPCR tests        |
| <b>Visseaux, 2020</b> | 83  | Direct qPCR | E<br>S<br>RdRP   | Nasopharyngeal<br>swabs           | Hospitalized patients                               | Unspecified                                      | RNA quantified by standardized RNA transcript control obtained from the European Virus Archive Program | RNA extraction by MagNA Pure LC Total Nucleic Acid Isolation Kit - Large Volume (Roche Diagnostics)                     | ABI 7500 platform (Applied Biosystems®)                                                                                  |
| <b>Vogels, 2020</b>   | 67  | qPCR        | N1<br>N2         | Nasopharyngeal<br>swabs<br>Saliva | COVID-19 diagnosed patients and healthcare workers  | Internal controls<br>using human<br>RNase P gene | Fluorescence emitted by modified fluorophore (Cy5 instead of FAM)                                      | Not required for direct PCR<br>RNA extraction by MagMax Viral/Pathogen Nucleic Acid Isolation Kit (paired with TaqPath) | SalivaDirect protocol for index qPCR test<br>ThermoFisher Scientific TaqPath COVID-19 combo kit for reference qPCR tests |

|                      |       |      |                |                                                                |                                                                                                                 |                                                                                         |                                       |                                                                                                                      |                                                                                                                                                                           |
|----------------------|-------|------|----------------|----------------------------------------------------------------|-----------------------------------------------------------------------------------------------------------------|-----------------------------------------------------------------------------------------|---------------------------------------|----------------------------------------------------------------------------------------------------------------------|---------------------------------------------------------------------------------------------------------------------------------------------------------------------------|
| <b>Wang, 2020</b>    | 181   | qPCR | ORF1ab<br>N    | Throat swabs                                                   | Suspected COVID patients                                                                                        | Positive control using recombinant plasmids<br>Negative control using nonribozyme water | Fluorescence emitted by TaqMan probes | RNA extraction by Tian Long automatic extraction kit (Tian Long, Xi'an, China)                                       | qRT-PCR kit (Sansure, Hunan, China) for both index and reference qPCR tests                                                                                               |
| <b>Wolters, 2020</b> | 88    | qPCR | E<br>N<br>RdRP | Nasopharyngeal or mid-turbinate oropharyngeal swabs            | Patients tested for SARS-CoV-2                                                                                  | Unspecified                                                                             | Fluorescence emitted by TaqMan probes | RNA extraction by MagNApure 96 DNA and Viral NA Small Volume, CT/NG extraction protocol, EasyMAG extraction reagents | Cepheid GeneXpert systems using the Xpert Xpress SARS-CoV-2 test                                                                                                          |
| <b>Wozniak, 2020</b> | 50    | qPCR | N1<br>N2       | Nasopharyngeal swabs                                           | Outpatients                                                                                                     | Internal controls using human RNase P gene                                              | Fluorescence emitted by TaqMan probes | Acid pH method of RNA extraction using TaqMan qPCR                                                                   | StepOnePlus Real-Time PCR System (Applied Biosystems) for both index and reference qPCR tests                                                                             |
| <b>X. Lu, 2020</b>   | 2,923 | qPCR | N1<br>N2<br>N3 | Pharyngeal swabs<br>Sputum<br>Bronchoalveolar aspirate<br>Etc. | Suspected individuals with COVID-19<br>Close contacts<br>Individuals from abroad<br>COVID-19 confirmed patients | Internal controls using human RNase P gene                                              | Fluorescence emitted by TaqMan probes | RNA extraction by the EZ1 DSP Virus Kit (QIAGEN)                                                                     | TaqPath 1-Step RT-qPCR Master Mix, CG (Thermo Fisher Scientific) in 96-well plates on Applied Biosystems 7500 Fast Dx Real-Time PCR Instrument (Thermo Fisher Scientific) |

|                                   |     |      |            |                               |                             |                                                                                         |                                                                                                                                   |                                                                                                           |                                                                                                                                                                                                                                 |
|-----------------------------------|-----|------|------------|-------------------------------|-----------------------------|-----------------------------------------------------------------------------------------|-----------------------------------------------------------------------------------------------------------------------------------|-----------------------------------------------------------------------------------------------------------|---------------------------------------------------------------------------------------------------------------------------------------------------------------------------------------------------------------------------------|
| <b>Xiao, 2020</b>                 | 25  | qPCR | ORF1b<br>N | Throat swabs<br>Sputum        | Suspected COVID<br>patients | Positive controls<br>using plasmid<br>pEasy-T1<br>(TransGen Biotech,<br>Beijing, China) | Fluorescence emit-<br>ted by TaqMan<br>probes                                                                                     | RNA extraction by<br>NucliSens easyMag<br>apparatus<br>(bioMérieux, Marcy-<br>L'Étoile, France)           | TaqMan real-time RT-<br>PCR assays using TaqMan<br>Fast Virus 1-Step Master<br>Mix (Thermo Fisher Sci-<br>entific, MA, USA) on Bio-<br>Rad instrument (Bio-Rad<br>CFX96, CA, USA) for<br>both index and reference<br>qPCR tests |
| <b>Yip, 2020</b>                  | 213 | qPCR | N<br>RdRp  | Pharyngeal<br>swabs<br>Saliva | Suspected COVID<br>patients | Negative and posi-<br>tive controls                                                     | Fluorescence emit-<br>ted by sequence-<br>specific probes                                                                         | RNA extraction by<br>NucliSENS easyMAG<br>extraction system (bio-<br>Mérieux, Marcy-<br>l'Étoile, France) | QuantiNova Probe RT-<br>PCR Kit (QIAGEN, Hil-<br>den, Germany) for both in-<br>dex and reference qPCR<br>tests                                                                                                                  |
| <b>Zhen,<br/>2020</b>             | 270 | qPCR | S          | Nasopharyngeal<br>swabs       | Unspecified                 | Internal controls<br>using human<br>RNase P gene                                        | Fluorescence emit-<br>ted by TaqMan<br>probes                                                                                     | RNA extraction by<br>NucliSENS easyMag<br>platform (BioMérieux,<br>Durham, NC)                            | TaqPath 1-step RT-qPCR<br>kit (Catalog no. A15299,<br>Thermo Fisher Scientific)<br>for both index and refer-<br>ence qPCR tests                                                                                                 |
| <b>Ale-<br/>kseenko,<br/>2020</b> | 184 | LAMP | ORF1ab     | Nasopharyngeal<br>swabs       | Unspecified                 | Positive controls<br>No-template con-<br>trol                                           | Colorimetric read-<br>ing visualized by<br>Eva Green dye<br>Concentration<br>measured by Qubit<br>(Thermo Fisher Sci-<br>entific) | RNA extraction by<br>Ampure XP beads<br>(Beckman Coulter)                                                 | In-house master mix                                                                                                                                                                                                             |

|                   |     |                                |            |                                             |                                             |                                                                                          |                                                                                                          |                                                                                                                                                                  |                                                                                                                                                                                                                                           |
|-------------------|-----|--------------------------------|------------|---------------------------------------------|---------------------------------------------|------------------------------------------------------------------------------------------|----------------------------------------------------------------------------------------------------------|------------------------------------------------------------------------------------------------------------------------------------------------------------------|-------------------------------------------------------------------------------------------------------------------------------------------------------------------------------------------------------------------------------------------|
| <b>Ali, 2020</b>  | 24  | LAMP coupled with CRISPR-Cas12 | N<br>E     | Nasopharyngeal swabs                        | COVID patients tested positive and negative | Positive controls using synthetic RNA from Twist Bioscience<br>No-template control       | End-point fluorescence detection was monitored using a Tecan plate reader (Tecan 200)                    | RNA extraction by QIAquick Gel Extraction kit                                                                                                                    | In-house SARS-CoV-2 testing kit for LAMP                                                                                                                                                                                                  |
| <b>Ben, 2020</b>  | 182 | Direct LAMP qPCR               | N<br>E     | Throat and nose swabs                       | Unspecified                                 | No-template control, positive and negative control                                       | Colorimetric reading using phenol red                                                                    | RNA extraction by nucleic acid extraction systems (easyMAG/EMAG (Biomereuex), mag-LEAD 5bL (Precision System Science) or MagEx (STARlet) for reference qPCR test | Allplex 2019-nCoV (Seegene) or real-time fluorescent RTPCR Kit for Detecting SARS-2019-nCoV (BGI) for qPCR<br>WarmStart Colorimetric LAMP 2X Master Mix (New England BioLabs for LAMP                                                     |
| <b>Chow, 2020</b> | 366 | LAMP qPCR                      | ORF3a<br>E | Pharyngeal swabs<br>Sputum                  | Confirmed hospitalized COVID patients       | Positive and negative controls                                                           | Color change from pink to yellow indicates a positive result                                             | RNA extraction by QIAamp Viral RNA Mini kit (QIAGEN, Hilden, Germany)                                                                                            | Superscript III Platinum One-Step qRT-PCR kit (Thermo Fisher Scientific, Waltham, USA) in a LightCycler 480 real-time PCR system (Roche, Risch-Rotkreuz, Switzerland for qPCR<br>mL of Warmstart colorimetric LAMP 2 × Mastermix for LAMP |
| <b>Dao, 2020</b>  | 768 | LAMP<br>LAMP Sequencing qPCR   | N          | Nasopharyngeal swabs<br>Oropharyngeal swabs | Unspecified                                 | RNA-positive control for the N gene from fragment of SARS-CoV-2 Positive control plasmid | Colorimetric reading using phenol red; Absorbance measurement with Spark Cyto at 434 and 560 nm for LAMP | RNA extraction by QIAGEN for qPCR<br>No RNA extraction for swab-to-RT-LAMP                                                                                       | TIB MOLBIO Syntheselabor for qPCR; WarmStart™ Colorimetric LAMP 2X Master Mix for LAMP                                                                                                                                                    |

|                     |     |                            |                  |                                                       |                                                                                           |                                                                                         |                                                                                                                              |                                                                                                            |                                                                                                                                                                                    |
|---------------------|-----|----------------------------|------------------|-------------------------------------------------------|-------------------------------------------------------------------------------------------|-----------------------------------------------------------------------------------------|------------------------------------------------------------------------------------------------------------------------------|------------------------------------------------------------------------------------------------------------|------------------------------------------------------------------------------------------------------------------------------------------------------------------------------------|
| <b>Flynn, 2020</b>  | 62  | Direct LAMP qPCR           | N1<br>N2         | Nasal swabs<br>Throat swabs                           | Emergency room patients<br>(Both previously diagnosed as positive and negative)           | Control using pure RNA                                                                  | Colorimetric reading using pH sensitive dye                                                                                  | RNA extraction by automated NucliSENSE easyMAG or magLEAD automated extraction platform                    | 2019-nCoV detection kit, Seegene, CA, USA for qPCR; WarmStart® Colorimetric LAMP 2X Master Mix for LAMP                                                                            |
| <b>Fowler, 2020</b> | 315 | Regular LAMP<br>DirectLAMP | ORF1ab<br>E      | Nasopharyngeal swabs<br>Oropharyngeal swabs<br>Saliva | Adult inpatients                                                                          | Genesig®COVID-19 positive control<br>Negative extraction control<br>No template control | Opti-RT reverse transcriptase and a proprietary fluorescent dsDNA intercalating dye                                          | RNA extraction by Maxwell®RSC Viral Total Nucleic Acid Purification Kit (Promega UK Ltd., Southampton, UK) | COVID-19 genesig Real-Time PCR assay (Primerdesign Ltd, Chandler's Ford, UK) for qPCR; OptiGene Ltd. (Horsham, UK) COVID-19_RT-LAMP kits and RT-LAMP Isothermal Mastermix for LAMP |
| <b>Haq, 2020</b>    | 84  | LAMP                       | ORF1ab<br>N<br>S | Nasopharyngeal swabs                                  | Suspected COVID patients                                                                  | Unspecified                                                                             | Color change from pink to yellow color indicates a positive result                                                           | RNA extraction by TANBead Nucleic Acid Extractor (model SLA-16/32)                                         | Unspecified kit for qPCR WarmStart Colorimetric LAMP 2X Master Mix (New England Biolabs) for LAMP                                                                                  |
| <b>Hu, 2020</b>     | 481 | LAMP qPCR                  | ORF1ab<br>N<br>S | Nasopharyngeal swabs<br>Sputum                        | Inpatients with clinical-radiological suspicion of COVID-19 asymptomatic COVID-19 carrier | No template controls                                                                    | Visual color change of fluorescent light in response to UV excitation from purple to blue; by the laddering pattern of bands | RNA extraction by magnetic bead-based viral RNA isolation kit (Daan Gene, China)                           | ABI COVID-19 QuantStudio Dx real-time PCR system (Applied Biosystems, USA) for qPCR In-house solution mix for LAMP                                                                 |

|                       |     |                                     |                               |                      |                                                    |                                         |                                                                                                                                                                                      |                                                                                                                               |                                                                                                                                                                            |
|-----------------------|-----|-------------------------------------|-------------------------------|----------------------|----------------------------------------------------|-----------------------------------------|--------------------------------------------------------------------------------------------------------------------------------------------------------------------------------------|-------------------------------------------------------------------------------------------------------------------------------|----------------------------------------------------------------------------------------------------------------------------------------------------------------------------|
| <b>Huang, 2020</b>    | 16  | LAMP qPCR                           | ORF1ab<br>N1<br>N15<br>E<br>S | Throat swabs         | Unspecified                                        | SARS-CoV-2 Positive control plasmid     | Fluorescent dye from New England Biolabs (NEB)                                                                                                                                       | RNA extraction by RNA extraction kit, Health Biomed                                                                           | 2019-nCoV RT-PCR kit, Shanghai ZJ Bio-Tech for qPCR; WarmStart™ LAMP 29 Master Mix, NEB for LAMP                                                                           |
| <b>Jiang, 2020</b>    | 260 | LAMP qPCR                           | N                             | Sputum               | Inpatients<br>Outpatients                          | Unspecified                             | Unspecified                                                                                                                                                                          | RNA extraction by EZ-10 Spin Column Viral Total RNA Extraction Kit (Sangon Biotech Co., Ltd. Shanghai, China)                 | NMPA RT-PCR kit from Shanghai BioGerm Medical Biotechnology Co. Ltd.<br>And NMPA RT-PCR kit from DAAN Gene Co., Ltd for qPCR<br>In-house solution mix for LAMP             |
| <b>Kitagawa, 2020</b> | 76  | LAMP qPCR                           | N                             | Nasopharyngeal swabs | Suspected COVID patients                           | Positive and negative controls          | High turbidity under natural light after indicates a positive result                                                                                                                 | RNA extraction by QIAamp Viral RNA Mini Kit (QIAGEN, Hilden, Germany)                                                         | Unspecified kit for qPCR<br>Loopamp2019-nCoV (Eiken) for LAMP                                                                                                              |
| <b>Lalli, 2020</b>    | 30  | LAMP qPCR                           | ORF1ab<br>N                   | Saliva               | Individuals tested COVID-19 positive or negative   | Saliva-only control as negative control | Visual change of color from red to yellow<br>Color intensity measured by Bio-Tek Epoch microplate spectrophotometer<br>Fluorescence emitted by DNA-binding dye SYTO 9 (ThermoFisher) | No extraction for both LAMP and qPCR                                                                                          | Quantstudio 3 and 6 Real-Time PCR systems (ThermoFisher) for qPCR<br>WarmStart Colorimetric LAMP 2X Master Mix (NEB, M1800L) and QuantStudio 3 or 6 RT-PCR system for LAMP |
| <b>Lamb, 2020</b>     | 60  | Regular LAMP<br>Direct LAMP<br>qPCR | ORF1ab<br>N1<br>N2            | Nasopharyngeal swabs | Patients diagnosed as positive or negative by qPCR | Water as no template control            | Visual change of color from orange to Yellow using SYBR green I (Life Technologies)                                                                                                  | RNA extraction by instruments by Beaumont's Clinical Laboratory Improvement Amendments (CLIA)-licensed Clinical Reference Lab | CDC 2019-Novel Coronavirus (2019-nCoV) Real-Time RT-PCR Diagnostic Panel on a Maxwell Instrument for qPCR<br>In-house solution mix for LAMP                                |



|                        |     |           |                     |                                                          |                                                 |                                                                 |                                                                                                                   |                                                                                                                                                                                                                                              |                                                                                                                                                                                                                  |
|------------------------|-----|-----------|---------------------|----------------------------------------------------------|-------------------------------------------------|-----------------------------------------------------------------|-------------------------------------------------------------------------------------------------------------------|----------------------------------------------------------------------------------------------------------------------------------------------------------------------------------------------------------------------------------------------|------------------------------------------------------------------------------------------------------------------------------------------------------------------------------------------------------------------|
| <b>Lee, 2020</b>       | 157 | LAMP      | N1                  | Nasopharyngeal swabs                                     | Unspecified                                     | Water as no template control                                    | Fluorescence emitted by Taq-Man probes for qPCR<br>Unspecified method for LAMP                                    | RNA extraction by QI-Asymphony DSP Virus/Pathogen Mini Kit (Qiagen, Cat No. 937036) for qPCR<br>Solid-phase reversible immobilisation (SPRI) on carboxylated paramagnetic beads (Sera-Mag Magnetic Speed-Beads, from GE Healthcare) for LAMP | Dried Reverse Transcriptase<br>Isothermal Mastermix (Optigene, ISO-DR004-RT) for LAMP                                                                                                                            |
| <b>Lu, 2020</b>        | 56  | LAMP qPCR | N                   | Throat swabs                                             | Suspected COVID patients<br>Control populations | No-template control (NTC)                                       | Visual detection with cresol red from NEB                                                                         | RNA extraction kit, Liferiver, Shanghai                                                                                                                                                                                                      | SARS-CoV-2 RT-qPCR kit, Liferiver Bio; Light-Cycler 96 real-time PCR System for LAMP                                                                                                                             |
| <b>Mohon, 2020</b>     | 100 | LAMP qPCR | RdRp<br>S<br>E<br>N | Nasopharyngeal swabs (n=100)<br>Contrived samples (n=24) | Unspecified                                     | External control using primers against bacteriophage MS2        | 50X SYBR safe and CFX-96 real-time PCR detection system; measured in relative fluorescence units (RFU) per minute | RNA extraction by Promega SV Total RNA Isolation System                                                                                                                                                                                      | CFX-96 real-time PCR detection system<br>Solution mix with Warmstart® Rtx Reverse Transcriptase (New England Biolab, Whitby, ON) and Bst 2.0 Warmstart® DNA Polymerase (New England Biolab, Whitby, ON) for LAMP |
| <b>Papadakis, 2020</b> | 89  | LAMP qPCR | N<br>E<br>RdRp      | Nasopharyngeal swabs                                     | Suspected COVID patients                        | Positive controls using human RNase P gene<br>Negative controls | Colorimetric reading using phenol red                                                                             | RNA extraction by QI-Aamp DNA Micro Kit (Qiagen)                                                                                                                                                                                             | NucliSens easyMAG automated system and Benchtop equipment for qPCR<br>WarmStart 2 × Master Mix (New England Biolabs) for LAMP                                                                                    |

|                       |     |                                 |                                   |                                       |                                                            |                                                                             |                                                                                                              |                                                                                                                                                 |                                                                                                                                                  |
|-----------------------|-----|---------------------------------|-----------------------------------|---------------------------------------|------------------------------------------------------------|-----------------------------------------------------------------------------|--------------------------------------------------------------------------------------------------------------|-------------------------------------------------------------------------------------------------------------------------------------------------|--------------------------------------------------------------------------------------------------------------------------------------------------|
| <b>Rödel, 2020</b>    | 43  | RNA LAMP<br>Direct LAMP<br>qPCR | RdRP<br>M<br>E<br>N               | Pharyngeal swabs                      | Unspecified                                                | 30 samples from patients tested by qPCR as external control                 | Measured by real-time fluorescence detection using a DNA intercalating dye                                   | RNA extraction by QIAsymphony DSP Virus/Pathogen Mini Kit for qPCR; QIAAsymphony DSP Virus/Pathogen Mini Kit (Qiagen, Hilden, Germany) for LAMP | Allplex™ 2019-nCoV assay for qPCR; Variplex™ SARS-CoV-2 RT-LAMP assay and Allplex™ assay for LAMP                                                |
| <b>Rohaim, 2020</b>   | 99  | AI-LAMP<br>qPCR                 | N<br>RdRp                         | Nasopharyngeal swabs                  | Suspected COVID patients                                   | Internal control using miR-cel-miR-39-3p                                    | Color change from pink to yellow color indicates a positive result                                           | RNA extraction by QIAamp Viral RNA Mini kit (Qiagen, Valencia, CA, USA)                                                                         | SuperScript III Platinum One-Step qRT-PCR Kit for qPCR<br>WarmStart™ Colorimetric LAMP 2X Master Mix (New England Biolabs, Hitchin, UK) for LAMP |
| <b>Schermer, 2020</b> | 171 | LAMP                            | ORF1a<br>ORF3a<br>ORF7a<br>N<br>M | Nasopharyngeal swabs                  | Symptomatic patients                                       | Positive and negative controls                                              | Color change from pink to yellow color indicates a positive result                                           | RNA extraction by automated MagNA Pure 96 system (Roche)                                                                                        | RealStar SARS-CoV-2 RT-PCR kit 1.0 for qPCR<br>WarmStart Colorimetric RT-LAMP mix (NEB) for LAMP                                                 |
| <b>Yan, 2020</b>      | 130 | LAMP<br>qPCR                    | ORF1ab<br>S                       | Swabs<br>Bronchoalveolar lavage fluid | Patients with pneumonia and suspected SARS-CoV-2 infection | Negative control using distilled water; Positive control using pseudo-virus | Colorimetric reading using fluorescent calcein and turbidity<br>Monitoring by Loopamp real-time turbidimeter | RNA extraction by QIAamp Viral RNA Mini Kits                                                                                                    | Real-time RT-PCR kit, BGI PathoGenesis Pharmaceutical Technology for qPCR; Loopamp RNA amplification kit, Eiken Chemical for LAMP                |

|                   |     |             |                       |        |                                             |                                |                                       |             |                                             |
|-------------------|-----|-------------|-----------------------|--------|---------------------------------------------|--------------------------------|---------------------------------------|-------------|---------------------------------------------|
| <b>Yang, 2020</b> | 463 | Direct LAMP | ORF1ab<br>ORF1e<br>N2 | Saliva | Healthy individuals<br>Infected individuals | RNaseP for positive control 10 | Colorimetric reading using phenol red | Unspecified | NEB's WarmStart LAMP 2x Master Mix for LAMP |
|-------------------|-----|-------------|-----------------------|--------|---------------------------------------------|--------------------------------|---------------------------------------|-------------|---------------------------------------------|

**Supplementary Table 2. Primary subgroup analysis for LAMP, dPCR, and qPCR assays using bivariate latent class model**

Summary of respective pooled sensitivity and specificity of the test of interest (e.g., LAMP using nasopharyngeal swabs, LAMP using saliva, dPCR using N primer etc.) and the reference test (EUA approved PCR assays) based on the number of true false positive and negative cases reported in the 71 studies are shown below. All dPCR assays required RNA extraction. Abbreviations: CI, Confident Interval

<sup>a</sup> Since bivariate models do not converge when the sample size is small, for subgroups with less than four included studies, univariate random-effects model was used to compute sensitivity and specificity of the test of interest assuming the reference test is the gold standard.

| Subgroups             | Number of studies (N)<br>[sample size (n)] | Pooled sensitivity of test of interest (CI) | Pooled specificity of test of interest (CI) | Pooled sensitivity of reference test (CI) | Pooled specificity of reference test (CI) |
|-----------------------|--------------------------------------------|---------------------------------------------|---------------------------------------------|-------------------------------------------|-------------------------------------------|
| <b>LAMP</b>           |                                            |                                             |                                             |                                           |                                           |
| <b>Overall</b>        | 31[3453]                                   | 86.2% (20.7%-99.9%)                         | 94.3% (49.1%-100%)                          | 96.7% (58.7%-100%)                        | 87.6% (19.2%-99.9%)                       |
| <b>Specimen</b>       |                                            |                                             |                                             |                                           |                                           |
| Nasopharyngeal swabs  | 10[1004]                                   | 87.4% (55.0%-99.0%)                         | 94.8% (69.7%-99.9%)                         | 99.1% (96.0%-99.9%)                       | 98.9% (96.2%-99.9%)                       |
| Oropharyngeal swabs   | 11[1046]                                   | 84.5% (18.3%-99.9%)                         | 94.7% (53.3%-100%)                          | 95.4% (66.7%-99.9%)                       | 91.5% (31.5%-99.9%)                       |
| Saliva                | 5[773]                                     | 69.0% (1.0%-99.8%)                          | 86.8% (2.3%-100%)                           | 84.5% (3.1%-100%)                         | 72.1% (1.6%-99.9%)                        |
| Sputum                | 7[513]                                     | 74.6% (0.4%-99.4%)                          | 89.4% (0.6%-100%)                           | 88.5% (0.4%-100%)                         | 83.4% (0.1%-100%)                         |
| <b>RNA extraction</b> |                                            |                                             |                                             |                                           |                                           |

|                              |                     |                     |                     |                     |                     |
|------------------------------|---------------------|---------------------|---------------------|---------------------|---------------------|
| With RNA extraction          | 17[2445]            | 85.7% (24.1%-99.8%) | 93.7% (36.8%-100%)  | 95.4% (33.8%-100%)  | 94.3% (33.5%-100%)  |
| Without RNA extraction       | 14[1008]            | 85.0% (39.1%-99.3%) | 99.1% (96.6%-100%)  | 98.6% (94.7%-99.9%) | 85.1% (51.5%-98.1%) |
| <b>Primer/probe Set</b>      |                     |                     |                     |                     |                     |
| ORF1ab primer                | 6[1008]             | 80.8% (9.7%-99.8%)  | 96.4% (55.0%-100%)  | 95.5% (45.2%-100%)  | 91.8% (26.8%-99.9%) |
| N primer                     | 10[1136]            | 83.3% (29.2%-98.7%) | 95.2% (27.3%-100%)  | 94.6% (44.9%-100%)  | 89.7% (4.6%-100%)   |
| E primer                     | 2[146] <sup>a</sup> | 81.6% (71.0%-89.5%) | 100% (94.9%-100%)   | -                   | -                   |
| <b>RNA extraction method</b> |                     |                     |                     |                     |                     |
| Magnetic beads               | 5[408]              | 91.5% (73.7%-98.7%) | 99.0% (96.5%-99.9%) | 98.7% (95.4%-99.9%) | 93.6% (68.3%-99.8%) |
| Silica spin column           | 19[1634]            | 75.7% (0.2%-99.9%)  | 87.0% (0.5%-100%)   | 88.9% (0.5%-100%)   | 85.7% (0.1%-100%)   |
| <b>dPCR</b>                  |                     |                     |                     |                     |                     |
| <b>Overall</b>               | 15[783]             | 95.8% (54.9%-100%)  | 73.8% (0.9%-100%)   | 85.0% (12.4%-99.8%) | 94.8% (32.9%-100%)  |
| <b>Specimen</b>              |                     |                     |                     |                     |                     |
| Pharyngeal swabs             | 7[459]              | 95.1% (66.4%-99.8%) | 86.0% (35.1%-99.6%) | 82.9% (22.3%-99.5%) | 97.6% (86.1%-99.9%) |
| Saliva                       | 3[152] <sup>a</sup> | 89.7% (75.8%-97.1%) | 77.0% (68.1%-84.4%) | -                   | -                   |
| Sputum                       | 2[98] <sup>a</sup>  | 100% (93.4%-100%)   | 88.6% (75.4%-96.2%) | -                   | -                   |
| <b>Primer/probe Set</b>      |                     |                     |                     |                     |                     |
| ORF1ab primer                | 11[544]             | 99.4% (97.6%-100%)  | 74.7% (1.8%-100%)   | 96.5% (87.5%-99.9%) | 99.5% (97.8%-100%)  |
| N primer                     | 15[783]             | 95.8% (54.9%-100%)  | 73.8% (0.9%-100%)   | 85.0% (12.4%-99.8%) | 94.8% (32.9%-100%)  |
| <b>RNA extraction method</b> |                     |                     |                     |                     |                     |
| Silica spin column           | 8[536]              | 96.9% (86.4%-99.9%) | 87.7% (14.8%-99.8%) | 76.1% (7.6%-99.8%)  | 98.1% (92.4%-99.9%) |
| Automatic                    | 4[173]              | 98.3% (92.5%-100%)  | 95.8% (79.8%-99.8%) | 93.8% (72.6%-99.7%) | 98.9% (95.3%-99.9%) |
| <b>qPCR</b>                  |                     |                     |                     |                     |                     |

|                              |                     |                     |                     |                     |                     |
|------------------------------|---------------------|---------------------|---------------------|---------------------|---------------------|
| <b>Overall</b>               | 25[3667]            | 93.4% (60.9%-99.9%) | 93.1% (47.1%-100%)  | 99.5% (98.1%-100%)  | 99.2% (97.2%-99.9%) |
| <b>Specimen</b>              |                     |                     |                     |                     |                     |
| Pharyngeal swabs             | 13[2250]            | 88.0% (2.8%-100%)   | 90.9% (4.3%-100%)   | 88.1% (2.0%-99.4%)  | 90.4% (1.4%-100%)   |
| Saliva                       | 10[1175]            | 84.7% (1.2%-99.9%)  | 84.3% (0.2%-100%)   | 86.3% (0.7%-100%)   | 86.3% (0.7%-100%)   |
| <b>RNA extraction</b>        |                     |                     |                     |                     |                     |
| With RNA extraction          | 19[3230]            | 91.6% (11.7%-100%)  | 89.3% (7.3%-100%)   | 92.5% (5.9%-100%)   | 91.3% (6.6%-100%)   |
| Without RNA extraction       | 6[437]              | 87.9% (63.5%-98.6%) | 95.6% (80.3%-99.7%) | 96.3% (85.7%-99.7%) | 94.5% (46.5%-99.8%) |
| <b>Primer/probe Set</b>      |                     |                     |                     |                     |                     |
| ORF1ab primer                | 5[1369]             | 84.7% (2.6%-100%)   | 84.6% (0.0%-100%)   | 81.9% (0.1%-100%)   | 85.9% (0.2%-100%)   |
| N primer                     | 12[899]             | 84.8% (0.0%-100%)   | 80.8% (0.1%-100%)   | 87.3% (0.5%-100%)   | 84.9% (0.0%-100%)   |
| E primer                     | 11[2442]            | 71.5% (0.3%-100%)   | 74.0% (0.1%-100%)   | 75.3% (0.1%-100%)   | 72.4% (0.0%-100%)   |
| <b>RNA extraction method</b> |                     |                     |                     |                     |                     |
| Magnetic beads               | 7[1170]             | 94.4% (69.9%-99.9%) | 99.6% (98.6%-100%)  | 99.0% (96.4%-99.9%) | 98.9% (95.8%-99.9%) |
| Silica spin column           | 10[1805]            | 98.4% (19.8%-100%)  | 84.8% (3.0%-99.8%)  | 74.0% (3.0%-99.8%)  | 91.3% (61.8%-99.6%) |
| Automatic                    | 2[224] <sup>a</sup> | 96.7% (88.5%-99.6%) | 91.5% (86.1%-95.3%) | -                   | -                   |

### Supplementary Table 3. dAUC and P values of LAMP, dPCR, and qPCR

Difference in AUC (dAUC) and P values of LAMP, dPCR, and qPCR. A P value of 0.05 or less (highlighted in bold) indicates statistical significance i.e., significant difference between two subgroups.

|                                 | dAUC                     | P value      |
|---------------------------------|--------------------------|--------------|
| LAMP                            |                          |              |
| Specimen                        |                          |              |
| Pharyngeal swabs vs. saliva     | -0.026 (-0.088, -0.011)  | <b>0.017</b> |
| Pharyngeal swabs vs. sputum     | -0.028 (-0.083, 0.080)   | 0.281        |
| Saliva vs. sputum               | -0.002 (-0.020, 0.125)   | 0.765        |
| Primer/probe set                |                          |              |
| ORF1ab vs. N                    | 0.017 (-0.012, 0.070)    | 0.204        |
| ORF1ab vs. E                    | -0.00044 (-0.034, 0.053) | 0.843        |
| N vs. E                         | -0.017 (-0.075, 0.035)   | 0.273        |
| RNA extraction                  |                          |              |
| With vs. without RNA extraction | 0.0056 (-0.0244, 0.0601) | 0.526        |
| RNA extraction method           |                          |              |
| Magnetic beads vs. spin column  | 0.019 (-0.035, 0.060)    | 0.254        |
| dPCR                            |                          |              |
| Specimen                        |                          |              |
| Pharyngeal swabs vs. saliva     | -0.029 (-0.081, -0.005)  | <b>0.032</b> |
| Pharyngeal swabs vs. sputum     | -0.031 (-0.079, 0.094)   | 0.32         |
| Saliva vs. sputum               | -0.002 (-0.020, 0.125)   | 0.765        |
| Primer/probe set                |                          |              |
| ORF1ab vs. N                    | 0.015 (0.011, 0.097)     | <b>0.045</b> |
| RNA extraction method           |                          |              |
| Spin column vs. automatic       | -0.039 (-0.148, 0.011)   | 0.093        |
| qPCR                            |                          |              |

|                                 |                         |              |
|---------------------------------|-------------------------|--------------|
| Specimen                        |                         |              |
| Pharyngeal swabs vs. saliva     | 0.028 (-0.0046, 0.109)  | 0.08         |
| Primer/probe set                |                         |              |
| ORF1ab vs. N                    | 0.0059 (-0.0467, 0.051) | 0.541        |
| ORF1ab vs. E                    | 0.0066 (-0.060, 0.052)  | 0.646        |
| N vs. E                         | 0.00068 (-0.043, 0.040) | 0.859        |
| RNA extraction                  |                         |              |
| With vs. without RNA extraction | 0.0367 (-0.0173, 0.134) | 0.203        |
| RNA extraction method           |                         |              |
| Magnetic beads vs. spin column  | 0.035 (0.007, 0.159)    | <b>0.031</b> |

**Supplementary Table 4. Sensitivity, specificity, and DOR in secondary subgroup analysis by clustering**

Pink represents dPCR, green for qPCR, and blue for LAMP. Since there were less than 4 studies testing on saliva samples in each cluster, only results for swab studies were shown. Swabs referred to pharyngeal swabs. The results showed that the three nucleic-acid tests generally performed better with *ORF1ab* than with *N* primer. All studies used WHO reference tests.

|                            |               | <span style="display: inline-block; width: 10px; height: 10px; background-color: #FFC0CB; border: 1px solid black;"></span> dPCR <span style="display: inline-block; width: 10px; height: 10px; background-color: #C8E6C9; border: 1px solid black; margin-left: 10px;"></span> qPCR <span style="display: inline-block; width: 10px; height: 10px; background-color: #BBDEFB; border: 1px solid black; margin-left: 10px;"></span> LAMP |                              |                             |                           |                            |                            |                         |
|----------------------------|---------------|------------------------------------------------------------------------------------------------------------------------------------------------------------------------------------------------------------------------------------------------------------------------------------------------------------------------------------------------------------------------------------------------------------------------------------------|------------------------------|-----------------------------|---------------------------|----------------------------|----------------------------|-------------------------|
| <i>With</i> RNA extraction | DOR           | Swabs                                                                                                                                                                                                                                                                                                                                                                                                                                    | 2082.41<br>(353.44-12269.35) | 2053.37<br>(680.75-6193.62) | 931.31<br>(94.51-1591.10) | 555.18<br>(107.73-2861.12) | 473.53<br>(104.36-2148.54) | 96.59<br>(18.36-508.26) |
|                            | Sensitivity % | Swabs                                                                                                                                                                                                                                                                                                                                                                                                                                    | 97.5<br>(90.5-99.4)          | 97.5 (88.0-99.5)            | 91.5<br>(76.1-97.3)       | 96.0<br>(88.7-98.6)        | 93.8<br>(88.6-96.7)        | 80.2<br>(54.4-93.3)     |
|                            | Specificity % | Swabs                                                                                                                                                                                                                                                                                                                                                                                                                                    | 97.9<br>(94.5-99.2)          | 97.1 (89.3-99.3)            | 98.4<br>(93.3-99.6)       | 96.0<br>(87.9-98.8)        | 93.1<br>(80.5-97.8)        | 94.1<br>(84.6-97.9)     |
|                            |               |                                                                                                                                                                                                                                                                                                                                                                                                                                          | ORF1ab                       |                             |                           | N                          |                            |                         |



## Supplementary Table 5. Summary of primer-probe sets for 66 studies

Primer sequences provided by the 66 studies, shown in 5'-3'. Abbreviation – F, Forward; B, Backward; FIP, Forward Inner Primer; BIP, Backward Inner Primer

| Study            | Probe/Primer Sets                                                                                                                                                                                                                                                                                                                                                                                                                                                                                                                                                                                                                                                                                                                             |
|------------------|-----------------------------------------------------------------------------------------------------------------------------------------------------------------------------------------------------------------------------------------------------------------------------------------------------------------------------------------------------------------------------------------------------------------------------------------------------------------------------------------------------------------------------------------------------------------------------------------------------------------------------------------------------------------------------------------------------------------------------------------------|
| <b>dPCR</b>      |                                                                                                                                                                                                                                                                                                                                                                                                                                                                                                                                                                                                                                                                                                                                               |
| Abasiyanik, 2020 | <p><i>RnaseP probe/primers sets for index dPCR test</i><br/> <i>NI, N2 or RnaseP probe/primers sets (IDT 2019-nCov CDC EUA) for reference qPCR test</i><br/> <i>Primer sequences not provided</i><br/> <i>Primers targeting RdRp</i></p>                                                                                                                                                                                                                                                                                                                                                                                                                                                                                                      |
| Alteri, 2020     | <p><i>Forward: 5'- GACTTTGTGAATGAGTTTTACGC-3'</i><br/> <i>Reverse: 5'- AGCCACTAGACCTTGAGATGC-3'</i><br/> <i>FAM Probe: 5'- CACACAACAGCATCGTCAGA-3'</i><br/> <i>housekeeping gene RNase P: HEX</i><br/> <i>Forward: 5'- AGATTTGGACCTGCGAGCG-3'</i><br/> <i>Reverse: 5'- GAGCGGCTGTCTCCACAAGT-3'</i><br/> <i>HEX Probe: 5'- TTCTGACCTGAAGGCTCTGCGCG-3'</i><br/> <i>CN-CDC-1 (ORF1ab) (FAM)</i><br/> <i>Forward: "CCCTGTGGGTTTTACTA"</i><br/> <i>Reverse: "ACGATTGTGCATCAGCTGA"</i><br/> <i>Probe: "CCGTCTGCGGTATGTGAAAGGTTATGG"</i><br/> <i>CN-CDC-2 (ORF1a) (FAM)</i><br/> <i>Forward: "GGGGAATTTCCTGCTAT"</i><br/> <i>Reverse: "CAGACATTTTGCTCTCAAGCTG"</i><br/> <i>Probe: "TTGCTGCTGCTTGACAGATT"</i><br/> <i>RdRP_SARSr (RdRP) (HEX)</i></p> |
| Cassinari, 2020  | <p><i>Forward: "GTGARATGGTCATGTGTGGCGG"</i><br/> <i>Reverse: "CARATGTTAAASACTATTAGCATA"</i><br/> <i>Probe: "CCAGGTGGWACRATCMGGTGATGC"</i><br/> <i>2019-nCoV_N1 (N) (HEX)</i><br/> <i>Forward: "GACCCAAAATCAGCGAAAT"</i><br/> <i>Reverse: "TCTGGTACTGCCAGTTGAATCTG"</i><br/> <i>Probe: "ACCCCGCATTACGTTGGTGGACC"</i><br/> <i>nCoV_IP2 (RdRP) (HEX)</i><br/> <i>Forward: "ATGAGCTTAGTCCTGTTG"</i><br/> <i>Reverse: "CTCCCTTTGTTGTGTGTG"</i><br/> <i>Probe: "AGATGTCTTGTGCTGCCGGTA"</i><br/> <i>nCoV_IP4 (RdRP) (FAM)</i><br/> <i>Forward: "GGTAACTGGTATGATTTTCG"</i></p>                                                                                                                                                                        |

Reverse: "CTGGTCAAGGTTAATATAGG"  
Probe: "TCATACAAACCACGCCAGG"

Dang, 2020

ORF1ab, N (BioGerm Medical Biotechnology Co., Ltd., Shanghai, China)  
Primer sequences not provided

Deiana, 2020

2019-nCoV CDC dPCR triplex probe (N1, N2)  
Primer sequences not provided

Dong, 2020

ORF1ab, N probe/primers sets (according to Chinese CDC)  
Primer sequences not provided

Liu, 2020

N probe/primers sets (in-house)  
Primers targeting N gene  
Forward: "CAACTCCAGGCAGCAGTAGGG"  
Reverse: "CTCTCAAGCTGGTTCAATCTGTCA"  
Probe: "CY5-AAGAGCAGCATCACCG-MGB"  
Internal control  
Forward: "GGGCTCTTGCAGGTCTCTC"  
Reverse: "CCAGCAAGAGTCCCCATCC"  
Probe: "VIC-AGCCCCTTGTGGACATAGGGGTTT-BHQ1"

Oberding, 2020

E probe/primers sets (based on Corman et al.)  
Primer sequences not provided

Suo, 2020

ORF1ab, N (RainSure Scientific) (according to Chinese CDC)  
Primers targeting ORF1ab  
Forward: "CCCTGTGGGTTTTACACTTAA"  
Reverse: "ACGATTGTGCATCAGCTGA"  
Probe: "FAM-CCGTCGCGGTATGTGGAAAGGTTATGG-BHQ1"  
Primers targeting N  
Forward: "GGGGAACCTTCTCCTGCTAGAAT"  
Reverse: "CAGACATTTTGCTCTCAAGCTG"  
Probe: "HEX-TTGCTGCTGCTTGACAGATT-TAMRA"

Y. Jiang, 2020

Primers targeting ORF1ab gene  
Forward: "TGGGGYTTTACRGGTAACTT"  
Reverse: "AACRCGCTTAACAAAGCACTC"  
Probe: "TAGTTGTGATGCWATCATGACTAG"  
Primers targeting N gene  
Forward: "TAATCAGACAAGGAACTGATTA"  
Reverse: "CGAAGGTGTGACTTCCATG"  
Probe: "GCAAATTGTGCAATTTGCGG"

Yu, 2020

ORF1ab, N probe/primers sets  
Primer sequences not provided

## qPCR

Altawalah, 2020  
*Primer targeting ORF1ab, N, and S genes*  
*Primer sequences not provided*

Anderson, 2020  
*Primer targeting N gene*  
*Primer sequences not provided*  
*Primers targeting E according to Corman et al., 2020*  
*Forward “ACAGGTACGTTAATAGTTAATAGCGT”*  
*Reverse “ATATTGCAGCAGTACGCACACA”*  
*Probe “FAM-ACACTAGCC/ZEN/ATCCTTACTGCGCTTCG-ABkFQ”*  
  
*Primers targeting RdRP according to Corman et al., 2020*  
*Forward “GTGARATGGTCATGTGTGGCGG”*  
*Reverse “CARATGTTAAASACACTATTAGCATA”*  
*Probe 1 “FAM-CCAGGTGGW/ZEN/ACRTCATCMGGTGATGC-ABkFQ”*  
*Probe 2 “FAM-CAGGTGGAA/ZEN/CCTCATCAGGAGATGC-ABkFQ”*  
  
*Primers targeting N according to Corman et al., 2020*  
*Forward “CACATTGGCACCCGCAATC”*  
*Reverse “GAGGAACGAGAAGAGGCTTG”*  
*Probe “FAM-ACTTCCTCA/ZEN/AGGAACAACATTGCCA-ABkFQ”*

Barra, 2020  
  
*Primers targeting N1 according to the Centers for Disease Control (CDC)*  
*Forward “GACCCCAAATCAGCGAAAT”*  
*Reverse “TCTGGTACTGCCAGTTGAATCTG”*  
*Probe “FAM-ACCCCGCAT/ZEN/TACGTTTGGTGGACC-ABkFQ”*  
  
*Primers targeting N2 according to the Centers for Disease Control (CDC)*  
*Forward “TTACAAAACATTGGCCGCAA”*  
*Reverse “GCGCGACATTCCGAAGAA”*  
*Probe “FAM-ACAATTTGC/ZEN/CCCCAGCGCTTCAG-ABkFQ”*  
  
*Primers targeting N3 according to the Centers for Disease Control (CDC)*  
*Forward “GGGAGCCTTGAATACACCAAAA”*  
*Reverse “TGTAGCACGATTGCAGCATTG”*  
*Probe “FAM-AYCACATTG/ZEN/GCACCCGCAATCCTG-ABkFQ”*

Bruce, 2020  
  
*Primers targeting N genes*  
*2019-nCoV\_N1-F 2019-nCoV\_N1 forward primer 50-GAC CCC AAA ATC AGC GAA AT-30*  
*2019-nCoV\_N1-R 2019-nCoV\_N1 reverse primer 50-TCT GGT TAC TGC CAG TTG AAT CTG-30*  
*2019-nCoV\_N1-P 2019-nCoV\_N1 probe 50-FAM-ACC CCG CAT TAC GTT TGG TGG ACC-BHQ1-30*  
*2019-nCoV\_N2-F 2019-nCoV\_N2 forward primer 50-TTA CAA ACA TTG GCC GCA AA-30*  
*2019-nCoV\_N2-R 2019-nCoV\_N2 reverse primer 50-GCG CGA CAT TCC GAA GAA-30*  
*2019-nCoV\_N2-P 2019-nCoV\_N2 probe 50-FAM-ACA ATT TGC CCC CAG CGC TTC AG-BHQ1-30*  
*2019-nCoV\_N3-F 2019-nCoV\_N3 forward primer 50-GGG AGC CTT GAA TAC ACC AAA A-30*  
*2019-nCoV\_N3-R 2019-nCoV\_N3 reverse primer 50-TGT AGC ACG ATT GCA GCA TTG-30*  
*2019-nCoV\_N3-P 2019-nCoV\_N3 probe 50-FAM-AYC ACA TTG GCA CCC GCA ATC CTG-BHQ1-30*

Chan, 2020  
*Primers targeting RdRp/Hel, S, or N genes*  
*Primer sequences not provided*

Dorlass, 2020  
*Primer targeting E gene (same as in Corman et al.)*  
*E\_Sarbeco\_Forward ACAGGTACGTTAATAGTTAATAGCGT*  
*E\_Sarbeco\_Probe1 FAM-ACACTAGCCATCCTTACTGCGCTTCG-BBQ*  
*E\_Sarbeco\_Reverse ATATTGCAGCAGTACGCACACA*

Freire, 2020  
*Primers targeting N genes*  
*Primer sequences not provided*

Garcia, 2020  
*Primers targeting N genes*  
*Primer sequences not provided*  
*Primer targeting E gene*  
*E\_Sarbeco\_Forward1 "ACAGGTACGTTAATAGTTAATAGCGT" 0.4uM*  
*E\_Sarbeco\_Reverse2 "ATATTGCAGCAGTACGCACACA" 0.4uM*  
*E\_Sarbeco\_Probe1 "FAM/ZEN- ACACTAGCCATCCTTACTGCGCTTCG- IaBkFQ" 0.2uM*

Hasan, 2020  
*Internal control*  
*MS2-TM3-Forward "GGCTGCTCGCGGATACCC" 0.2uM*  
*MS2-TM3-Reverse "TGAGGGAATGTGGGAACCG" 0.2uM*  
*MS2-TM2JOE "JOE/ZEN-ACCTCGGGTTCCGTCTTGCTCGT- IaBkFQ" 0.1uM*

Jung, 2020  
*Primers targeting N and RdRp/ORF1 using primer sets from institutes including China CDC, HKU, Japan NIID, ThailandNIH, US CDC, and Charite*

Kandel, 2020  
*Primers targeting E genes*  
*Primer sequences not provided*

Klein, 2020  
*Primers targeting E gene (based Corman et al.)*  
*Forward "ACAGGTACGTTAATAGTTAATAGCGT"*  
*Reverse "ATATTGCAGCAGTACGCACACA"*  
*Probe "FAM-ACACTAGCCATCCTTACTGCGCTTCG-BBQ"*

Konrad, 2020  
*Primers targeting E gene (based Corman et al.)*  
*Forward "ACAGGTACGTTAATAGTTAATAGCGT"*  
*Reverse "ATATTGCAGCAGTACGCACACA"*  
*Probe "FAM-ACACTAGCCATCCTTACTGCGCTTCG-BBQ"*

Lübke, 2020  
*Primers targeting E gene*  
*CoV-E-Forward "CTTTTCTTGCTTTCGTGGTATTCT" 400 nM*  
*CoV-E-Reverse "TACAAGACTCACGTTAACAATATTGCA" 400 nM*  
*CoV-E-Probe "FAM-CTAGCCATCCTTACTGCGCTTCGATTGTG-BHQ" 200 nM*  
*Internal control targeting HBV-SynQ*  
*HBV-Taq1 "CAACCTCCAATCACTCACCAAC" 200 nM*  
*HBV-Taq2 "ATATGATAAAACGC GCAGACAC"200 nM*  
*HBV-IC "Cy5-CTGCCGAGCTCTGACTA-BHQ" 200 nM*

McCormick-Baw, 2020  
*Primers targeting N2 and E genes*  
*Primer sequences not provided*

Merindol, 2020  
Primers targeting N, E, S, and RdRp genes  
Primer sequences not provided

Moreno-Contreras, 2020  
Primers targeting E genes  
Primer sequences not provided  
Primers for internal control (EXO)  
Forward “GGCGGAAGAACAGCTATTGC”  
Reverse “GGAACCTAAGACAAGTGTGTTTATGG”  
Probe “Cy5-ACAATTTGCCCCAGCGCTTCAG-BHQ”  
Complete probe and primer sequences can be found in the CDC SARS-CoV-2 protocol  
<https://www.fda.gov/media/134922/download>

Perchetti, 2020

Pujadas, 2020  
Primers targeting ORF1a, E, and N genes  
Primer sequences not provided

Ranoa, 2020  
nCOV\_N1 Forward Primer Aliquot (CN 10006830), nCOV\_N1 Reverse Primer Aliquot (CN 10006831), nCOV\_N1 Probe Aliquot (CN 10006832),  
nCOV\_N2 Forward Primer Aliquot (CN 10006833), nCOV\_N2 Reverse Primer Aliquot (CN 10006834), nCOV\_N2 Probe Aliquot (CN 10006835), RNase P Forward Primer  
Aliquot (CN 10006836), RNase P Reverse Primer Aliquot (CN 10006837), RNase P Probe Aliquot (CN 10006838) 2019-nCoV\_N\_Positive Control (IDT CN 10006625)  
Primer sequences not provided  
Nested PCR  
nForward1 AYTCAATGAGTTATGAGGAYCAAGATGC 400 nM  
nReverse1 GACATCAGCATACTCCTGATTWGGATG 400 nM  
nForward2 TAGTACTATGACMAATAGACAGTTYCATC 500 nM  
nReverse2 CCTTAGTAAGGTCAGTCTCAGTCC 500 nM

Ratcliff, 2020  
Charité-RdRP  
RdRp\_SARSr-Forward GTGARATGGTCATGTGTGGCGG 600 nM  
RdRp\_SARSr-Probe2 FAMCAGGTGGAACTCATCAGGAGATGCBHQ 100 nM  
RdRp SARSr-Reverse CAAATGTTAAARACACTATTAGCATA 800 nM

CDC N1  
2019-nCoV\_N1-Forward GACCCCAAATCAGCGAAAT 500 nM  
2019-nCoV\_N1-Probe FAM-ACCCCGCATTACGTTTGGTGGACCBHQ 125 nM  
2019-nCoV\_N1-Reverse TCTGGTACTGCCAGTTGAATCTG 500 nM

Sun, 2020  
Primers targeting ORF1ab, N, and E genes  
Primer sequences not provided

Vaz, 2020  
Primers targeting E and RdRp genes  
Primer sequences not provided

Visseaux, 2020  
Primer sets designed by Corman et al.

Vogels, 2020  
Primers targeting N genes  
Primers and probe for N1  
N1-Forward: GACCCCAAATCAGCGAAAT  
N1-Reverse: TCTGGTACTGCCAGTTGAATCTG  
N1-Probe: FAM-ACCCCGCATTACGTTTGGTGGACC-IBFQ

*Primers and probe for N2*  
N2-Forward: TTACAAACATTGGCCGCAA  
N2-Reverse: GCGCGACATTCCGAAGAA  
N2-Probe: HEX-ACAATTTGCCCCAGCGCTTCAG-IBFQ  
*Internal control*  
*Primers and probe for RNase P*  
RP-Forward: AGATTTGGACCTGCGAGCG  
RP-Reverse: GAGCGGCTGTCTCCACAAGT  
RP-Probe: Cy5-TTCTGACCTGAAGGCTCTGCGCG-IBRQ

Wang, 2020

*Primers targeting ORF1ab and N genes*  
*Primer sequences not provided*

Wolters, 2020

*Primers targeting E, N1, and RdRP genes*  
*Primers sequences not provided*

Wonzinak, 2020

*Primers targeting N genes*  
*Primers and probe for N1*  
N1-Forward: "GACCCCAAATCAGCGAAAT"  
N1-Reverse: "TCTGGTACTGCCAGTTGAATCTG"  
N1-probe: "FAM-ACCCCGCATTACGTTGGTGGACC-BHQ1"  
*Primers and probe for N2*  
N2- Forward: "TTACAAACATTGGCCGCAA"  
N2- Reverse: "GCGCGACATTCCGAAGAA"  
N2-probe: "FAM-ACAATTTGCCCCAGCGCTTCAG-BHQ1"  
*Internal control*  
*Primers and probe for RNase P*  
RP2- Forward: "AGATTTGGACCTGCGAGCG"  
RP2- Reverse: "GAGCGGCTGTCTCCACAAGT"  
RP2-probe: "FAM-TTCTGACCTGAAGGCTCTGCGCG-BHQ1"  
*Primers targeting N1 gene*  
Forward- "GACCCCAAATCAGCGAAAT"  
Reverse- "TCTGGTACTGCCAGTTGAATCTG"  
Probe- "ACCCCGCATTACGTTGGTGGACC"

X. Lu, 2020

*Primers targeting N2 gene*  
Forward- "TTACAAACATTGGCCGCAA"  
Reverse- "GCGCGACATTCCGAAGAA"  
Probe- "ACAATTTGCCCCAGCGCTTCAG"

*Primers targeting N3 gene*  
Forward- "GGGAGCCTTGAATACACCAAAA"  
Reverse- "TGTAGCACGATTGCAGCATTG"  
Probe- "AYCACATTGGCACCCGCAATCCTG"

*Primers targeting Human RNase P gene*  
Forward- "AGATTTGGACCTGCGAGCG"

Reverse- "GAGCGGCTGTCTCCACAAGT"  
Probe- "TTCTGACCTGAAGGCTCTGCGCG"

*IPBCAMS assays*

*Primers targeting ORF1b gene*

Forward- "ACGGTGACATGGTACCACAT"

Reverse- "CTAAGTTGGCGTATACGCGT"

Probe- "TACACAATGGCAGACCTCGTCTATGC"

*Primers targeting N gene*

Forward- "AACACAAGCTTTCGGCAGAC"

Reverse- "ACCTGTGTAGGTCAACCACG"

Probe- "CAGCGCTTCAGCGTTCTTCGGAATGTCCG"

*WHO assays*

*Primers targeting ORF1b gene*

Forward- "GTGARATGGTCATGTGTGGCGG"

Reverse- "CARATGTTAAASACACTATTAGCATA"

Probe- "CAGGTGGAACCTCATCAGGAGATGC"

*Primers targeting N gene*

Forward- "CACATTGGCACCCGCAATC"

Reverse- "GAGGAACGAGAAGAGGCTTG"

Probe- "ACTTCCTCAAGGAACAACATTGCCA"

Xiao, 2020

*CCDC assays*

*Primers targeting ORF1b gene*

Forward- "CCCTGTGGGTTTACACTTAA"

Reverse- "ACGATTGTGCATCAGCTGA"

Probe- "CCGTCTGCGGTATGTGGAAAGGTTATGG"

*Primers targeting N gene*

Forward- "GGGGAACITTCCTGCTAGAAT"

Reverse- "CAGACATTTGCTCTCAAGCTG"

Probe- "TTGCTGCTGCTTGACAGATT"

*In-house single-tube nested real-time RT-PCR*

*Primers targeting RdRp/Hel gene*

Outer forward "AGGTATTGGGAACCTGAGTTTTATGAGGCTATGTACACAC"

Outer reverse "ACCTGGAGCATTGCAAACATACGGATTAACAGACAAGAC"

Inner forward "CGCATACAGTCTTRCAGGCT"

Inner reverse "GTGTGATGTTGAWATGACATGGTC"

Probe "FAM- TTAAGATGTGGTGTGCTTGCATACGTAGAC -IABkFQ"

Yip, 2020

*Primers targeting N gene*

Outer forward "AATTGCACAATTTGCCCCAGCGCTTCA"

Outer reverse "TGCGTCAATATGCTTATTCAGCAAAATGACTTGATCTTTGA"

Inner forward "GCGTTCCTCGGAATGTCCG"

Inner reverse "TTGGATCITTTGTCATCCAATTG"

Probe "FAM- AACGTGGTTGACCTACACAGST -IABkFQ"

*In-house non-nested real-time RT-PCR*

*Primers targeting RdRp/Hel gene*

COVID-19-RdRp/Hel-Forward “CGCATACAGTCTTRCAGGCT”

COVID-19-RdRp/Hel-Reverse “GTGTGATGTTGAWATGACATGGTC”

COVID-19-RdRp/Hel-Probe “FAM- TTAAGATGTGGTGCCTGCATACGTAGAC -IABkFQ”

*Primers targeting N gene*

NIID\_2019-nCOV\_N\_Forward2 “AAATTTGGGGACCAGGAAC”

NIID\_2019-nCOV\_N\_Reverse 2 “TGGCAGCTGTGTAGGTCAAC”

NIID\_2019-nCOV\_N\_Probe2 “FAM- ATGTCGCGCATTGGCATGGA -BHQ”

*Primers targeting S gene*

S Gene- Forward “TCA ACT CAG GAC TTG TTC TTA C”

S Gene- Reverse “TGG TAG GAC AGG GTT ATC AAA C”

S Gene-Probe “FAM- TGG TCC CAG AGA CAT GTA TAG CAT-BHQ1b”

*Primers targeting RNase P gene*

RNase P RP- Forward “AGA TTT GGA CCT GCG AGC G”

RP- Reverse “GAG CGG CTG TCT CCA CAA GT”

RP-Probe “Cy5-TTC TGA CCT GAA GGC TCT GCG CG-BHQ2c”

Zhen, 2020

**LAMP**

*Primer set targeting ORF1ab gene (iLACO) for LAMP*

F3 “CCACTAGAGGAGCTACTGTA”

B3 “TGACAAGCTACAACACGT”

FIP “AGGTGAGGGTTTTCTACATCACTATATTGGAACAAGCAAATTCTATGG”

BIP “ATGGGTTGGGATTATCCTAAATGTGTGCGGAGCAAGAACAAGTG”

LF “CAGTTTTTAACATGTTGTGCCAACC”

LB “TAGAGCCATGCCTAACATGCT”

*Primer set targeting ORF1ab gene (AS1) for LAMP*

F3 “CGGTGGACAAATTGTCAC”

B3 “CTTCTCTGGATTTAACACACTT”

FIP “TCAGCACACAAAGCCAAAAATTTATCTGTGCAAAGGAAATTAAGGAG”

BIP “TATTGGTGGAGCTAAACTTAAAGCCCTGTACAATCCCTTTGAGTG”

LF “TTACAAGCTTAAAGAATGTCTGAACACT”

LB “TTGAATTTAGGTGAAACATTTGTACG”

Alekseenko, 2020

*Primer set targeting ORF1ab gene (iLACO) for qPCR*

Forward “TAATACGACTCACTATAGGGTCAATAGCCGCCACTAGA”

Reverse “AGAAACGGTGTGACAAGCTAC”

*Primer set targeting ORF1ab gene (AS1/AS1E) for qPCR*

Forward “TAATACGACTCACTATAGGGTGTGAAATTGTCGGTGGA”

Reverse “GCTTTTAGAGGCATGAGTAGGC”



*Primer set targeting E-gene*

F3-E-2 GTACTCATTTCGTTTCGGAAG  
B3-E-1 AGGAACTCTAGAAGAATTCAGAT  
FIP-E-2 GGATGGCTAGTGTAAGCAAGGGTACGTTAATAGTTAATAGCGT  
BIP-E-2 CGCTTCGATTGTGTGCGTACGAGAGTAAACGTAAGAAAGAAGGTT  
LF-E-2 ACCACGAAAGCAAGAAAAAG  
LB-E-1 GCTGCAATATTGTTAACGTGAGTCT

*Primer set targeting N gene*

*N-gene-1*

Gene N-B-F3 \* ACCGAAGAGCTACCAGACG  
Gene N-B-B3 \* TGCAGCATTGTTAGCAGGAT  
Gene N-B-FIP \* TCTGGCCCAGTTCCTAGGTAGTTCGTGGTGGTGACGGTAA  
Gene N-B-BIP \* AGACGGCATCATATGGGTTGCACGGGTGCCAATGTGATCT  
Gene N-B-LF \* CCATCTGGACTGAGATCTTTCATT  
Gene N-B-LB \* ACTGAGGGAGCCTTGAATACA

*N-gene-2*

F3-N3-1 CCGAAGAGCTACCAGACGAA  
B3-N3-1 TGTAGCACGATTGCAGCATT  
FIP-N3-1 TCTGGCCCAGTTCCTAGGTAGTGGTGGTGACGGTAAATGAAAG  
BIP-N3-1 AGACGGCATCATATGGGTTGCACGGGTGCCAATGTGATCT  
LF-N3-1 AGAAATACCATCTTGGACTGAG  
LB-N3-1 ACTGAGGGAGCCTTGAATACAC

*RT-LAMP primers (N gene)*

*Primer Name Sequence Final conc. [nM]*

GeneN-A-F3 TGG CTA CTA CCG AAG AGC T 200  
GeneN-A-B3 TGC AGC ATT GTT AGC AGG AT 200  
GeneN-A-LF (Loop Forward) GGA CTG AGA TCT TTC ATT TTA CCG T 400  
GeneN-A-LB (Loop Backward) ACT GAG GGA GCC TTG AAT ACA 400  
GeneN-A-FIP (Forward Inner Primer) TCT GGC CCA GTT CCT AGG TAG TCC AGA CGA ATT CGT GGT GG 1600  
GeneN-A-BIP (Backward Inner Primer) AGA CGG CAT CAT ATG GGT TGC ACG GGT GCC AAT GTG ATC T 1600

*Internal Control*

RNaseP POP7 F3 TTGATGAGCTGGAGCCA 200  
RNaseP POP7 B3 CACCCTCAATGCAGAGTC 200  
RNaseP POP7 LF ATGTGGATGGCTGAGTTGTT 400  
RNaseP POP7 LB CATGCTGAGTACTGGACCTC 400  
RNaseP POP7 FIP GTGTGACCCTGAAGACTCGGTTTTAGCCACTGACTCGGATC 1600  
RNaseP POP7 BIP CCTCCGTGATATGGCTCTTCGTTTTTTCTTACATGGCTCTGGTC 1600

*RT-qPCR primers [nM]*

E\_Sarbeco\_R2 ATATTGCAGCAGTACGCACACA 400  
E\_Sarbeco\_P1 AACTAGCCATCCTTACTGCGCTTCG 200  
E\_Sarbeco\_F1 ACAGGTACGTTAATAGTTAATAGCGT 400  
Primer FW IC (Upstream/1/Fw) CATGGGAAGCAAGGGAATAATG 250  
Primer RV IC (Downstream/2/Rv) CCCAGCGAGCAATACAGAATTT 250

Ali, 2020

Ben, 2020

*Primers targeting orf3a and E genes*

F3 “CAAATWCACACAATCGACG” 0.18uM

B3 “TTAACAATATTGCAGCAGTACGCAC” 0.18uM

FIP “GAAACGAATGAGTACATAAGTTCGTATGATGARCCGACGACGACTACTA” 0.73uM

BIP “AGGTACGTAAATAGTTAATAGCGTAAATCGAAGCGCAGTAAGGATGGCTA” 0.73uM

LoopF “CTTGTGCTTACAAAGGCACGCTA” 0.36uM

LoopB “TTGCTTTYGTGGTATTCTTGCTA” 0.36uM

N-A set for N, 1a-A set for ORF1a for LAMP

Used primers designed by Zhang et al.

*Primers targeting ORF1a-A gene*

ORF1a-A-F3 CTGCACCTCATGGTCATGTT

ORF1a-A-B3 AGCTCGTCGCCTAAGTCAA

ORF1a-A-FIP GAGGGACAAGGACACCAAGTGTATGGTTGAGCTGGTAGCAGA

ORF1a-A-BIP CCAGTGGCTTACCGCAAGGTTTTAGATCGGCGCCGTAAC

ORF1a-A-LF CCGTACTGAATGCCTTCGAGT

ORF1a-A-LB TTCGTAAGAACGGTAATAAAGGAGC

*Primers targeting ORF1a-B gene*

ORF1a-B-F3 TCATCAAACGTTCCGGATGCT

ORF1a-B-B3 TATGGCCACCAGCTCCTT

ORF1a-B-FIP CGACCGTACTGAATGCCTTCGAGAACTGCACCTCATGGTCAT

ORF1a-B-BIP AGACACTTGGTGTCCITGTCCAGAAACCTTGGCGGTAAGC

ORF1a-B-LF CTGCTACCAGCTCAACCATAAC

ORF1a-B-LB TCATGTGGGCGAAATACCAGT

*Primers targeting ORF1a-C gene*

ORF1a-C-F3 CTGCACCTCATGGTCATGTT

ORF1a-C-B3 GATCAGTGCCAAGCTCGTC

ORF1a-C-FIP GAGGGACAAGGACACCAAGTGTGGTAGCAGAACTCGAAGGC

ORF1a-C-BIP CCAGTGGCTTACCGCAAGGTTTTAGATCGGCGCCGTAAC

ORF1a-C-LF ACCACTACGACCGTACTGAAT

ORF1a-C-LB TTCGTAAGAACGGTAATAAAGGAGC

*Primers targeting Gene N-A*

GeneN-A-F3 TGGCTACTACCGAAGAGCT

GeneN-A-B3 TGCAGCATTGTTAGCAGGAT

GeneN-A-FIP TCTGGCCCAGTTCCTAGGTAGTCCAGACGAATTCGTGGTGG

GeneN-A-BIP AGACGGCATCATATGGGTTGCACGGGTGCCAATGTGATCT

GeneN-A-LF GGACTGAGATCTTTCATTTTACCGT

GeneN-A-LB ACTGAGGGAGCCTTGAATACA

*Primers targeting Gene N-B*

GeneN-B-F3 ACCGAAGAGCTACCAGACG

GeneN-B-B3 TGCAGCATTGTTAGCAGGAT

GeneN-B-FIP TCTGGCCCAGTTCCTAGGTAGTTCGTGGTGGTACGGTAA

GeneN-B-BIP AGACGGCATCATATGGGTTGCACGGGTGCCAATGTGATCT

GeneN-B-LF CCATCTGGACTGAGATCTTTCATT

Chow, 2020

Dao, 2020

*GeneN-B-LB* ACTGAGGGAGCCTTGAATACA

*N1, N2 probe/primers sets*

- Chelex-100 (Bio-Rad # 1421253)
- WarmStart® Colorimetric LAMP 2 X Master Mix (NEB #M1800S/#M1800L)
- Nuclease free water (VWR # 10220-398)

*N2 primers:*

N2-F3 "ACCAGGAACTAATCAGACAAG"  
N2-B3 "GACTTGATCTTTGAAATTTGGATCT"  
N2-FIP "TCCGGAAGAACGCTGAAGCGGAACTGATTACAAAATTGGCC"  
N2-BIP CGCATTGGCATGGAAGTCACAATTTGATGGCACCTGTGTA" N2-  
LF "GGGGGCAAATTGTGCAATTTG"  
N2-LB "CTTCGGGAACGTGGTTGACC"

Flynn, 2020

*N1 primers:*

N1-F3 "TGGACCCCAAAATCAGCG"  
N1-B3 "GCCTTGTCCTCGAGGGAAT"  
N1-FIP CCACTGCGTTCTCCATTCTGGTAAATGCACCCCGCATTACG"  
N1-BIP CGCGATCAAAACAACGTCGGCCCTGCCATGTTGAGTGAGA"  
N1-LF "TGAATCTGAGGGTCCACCAA"  
N1-LB "GGTTACCCAATAATACTGCGTCTT"

Fowler, 2020

*ORF1ab probe/primers sets for LAMP*

*E probe/primers sets for qPCR*

*Primer sequences not provided*

Haq, 2020

*Primers targeting ORF1ab, N, and S genes*

*Primer sequences not provided*

*S probe/primers sets for LAMP*

*S gene primer*

F3 "CTAGGTTTCAA CTTACTTGC"  
F2 "TACATAGA AGTTATTTGA CTCCTGGTGA"  
LF "TGATTCTTCTTCA GGTTGGACAG C"  
F1c "TGGTGCTGC AGCTTATTAT"  
B1c "ATGAAAATGG AACCATACA GATGC"  
LB "AGACTGTGCACTTGACCCTC"  
B2 "CTCAGAAACAA AGTGTACGTT G"  
B3 "AATCCTTC ACTGTAGAAA AAGG"

Hu, 2020

*ORF1ab, N probe/primers sets for qPCR*

*Primers targeting N gene*

*Probe- FAM-TTGCCCCAGCGCTTCA-BHQ1*

*Forward- TTGGGGACCAGGAACTAAT*

*Reverse- GAAGGTGTGACTTCCATGC*

*Primers targeting ORF1ab gene*

Probe- HEX-TCCCACCCAAGAATAGCATAGATGC-BHQ1  
Forward- TTTAGATATATGAATTCACAGGGA  
Reverse- ACCAACACCCAACAATTTAAT  
Primers targeting RNP gene  
Probe- Cy5-TCCACAAGTCCGCGCAGAG-BHQ2  
Forward- AGATTTGGACCTGCGAG  
Reverse- ACTGAATAGCCAAGGTGAG  
LAMP primers O117, S17, N1 and N15, which target RNA encoding Orf1ab, S, N for LAMP  
Primers targeting N15 gene

Huang, 2020

F3 AGATCACATTGGCACCCG  
B3 CCATTGCCAGCCATTCTAGC  
FIP TGCTCCCTTCTGCGTAGAAGCCAATGCTGCAATCGTGCTAC  
BIP GCGCGCAGTCAAGCCTCTCCCTACTGCTGCCTGGAGTT  
LF GCAATGTTGTTCTTGAGGAAGTT  
LB GTTCCTCATCACGTAGTCGCAACA  
Primers targeting S17 gene  
F3 TCTTTCACACGTGGTGTT  
B3 GTACCAAAAATCCAGCCTC  
FIP CATGGAACCAAGTAACATTGGAAAACTGACAAAGTTTTTCAGATCC  
BIP CTCTGGGACCAATGGTACTAAGAGGACTTCTCAGTGGAAGCA  
LF GAAAGGTAAGAACAAGTCCTGAGT  
LB CTGTCCTACCATTAAATGATGGTGT  
Primers targeting O117  
F3 CCCCAAAATGCTGTTGTT  
B3 TAGCACGTGGAACCCAAT  
FIP GGTTTTCAAGCCAGATTCATTATGGATGTCACAATTCAGAAGTAGGA  
BIP TCTTCGTAAGGGTGGTCGCAGCACACTTGTATGGCAAC  
LF TCGGCAAGACTATGCTCAGG  
LB TTGCCTTGGAGGCTGTGT

ORF1ab, N, E probe/primers sets for qPCR  
Primer sequences not provided

Jiang, 2020

Primer set for N gene for LAMP  
nCoV-N-F3 CCAGAATGGAGAACGCAGTG  
nCoV-N-B3 CCGTCACCACCAAGAATT  
nCoV-N-FIP AGCGGTGAACCAAGACGCAGGG  
CGCGATCAAAACAACG  
nCoV-N-BIP AATTCCTCGAGGACAAGGCGA  
GCTCTTCGGTAGTAGCCAA  
nCoV-N-LF TTATTGGGTAAACCTTGGGGC  
nCoV-N-LB TTCCAATTAACCAATAGCAGTCC  
N gene primer for qPCR

Kitagawa, 2020

forward "AAA TTT TGG GGA CCA GGA AC"  
reverse "TGG CAG CTG TGT AGG TCA AC" 3.2  $\mu$ M  
probe "FAM-ATG TCG CGC ATT GGC ATG GA-TAMRA" 0.4  $\mu$ M  
Unspecified target gene for LAMP

Lalli, 2020  
*LAMP primers targeting ORF1ab and N genes*  
*Primer sequences can be found in the supplementary document of the study*

Primers targeting *ORR1ab*  
*F3 “TCCAGATGAGGATGAAGAAGA”*  
*B3 “AGTCTGAACAACCTGGTGTAAAG”*  
*FIP(F1c+F2) “AGAGCAGCAGAAGTGGCACAGGTGATTGTGAAGAAGAAGAG”*

Lamb, 2020  
*BIP(B1c+B2) “TCAACCTGAAGAAGAGCAAGAAGCTGATTGTCTCTACTGCC”*  
*LoopF “CTCATATTGAGTTGATGGCTCA”*  
*LoopB “ACAAACTGTTGGTCAACAAGAC”*

*ORF1abN1, N2 probe/primers sets for qPCR*

Lee, 2020  
*Primers targeting N1 genes*  
*Primer sequences not provided*

Primers targeting *N gene*  
*F3 GCCAAAAGGCTTCTACGCA*  
*B3 TTGCTCTCAAGCTGGTTCAA*

Lu, 2020  
*FIP TCCCCTACTGCTGCCTGGAGCAGTCAAGCCTCTTCTCGTT*  
*BIP TCTCCTGCTAGAATGGCTGGCATCTGTCAAGCAGCAGCAAAG*  
*LB TGGCGGTGATGCTGCTCTT*

*S and RdRP LAMP primer sets*  
*S gene primer set (S2)*  
*S2-F3 “ATTCTAAGCACACGCCTAT”*  
*S2-B3 “GAAGATAACCCACATAATAAGCT”*  
*S2-FIP “ACCTATTGGCAAATCTACCAATGGTTTAGTGCGTGATCTCCCT”*  
*S2-BIP “ATCACTAGGTTTCAAACCTTTACTTGCCTGTCCAACCTGAAGAAGA”*  
*S2-LPF “TTCTAAAGCCGAAAAACCTG”*  
*S2-LPB “CATAGAAGTTATTTGACTCCTGGTG”*

Mohon, 2020  
*RdRp gene primer set (S3)*  
*S3-F3 “CACCTTATGGGTTGGGATT”*  
*S3-B3 “AACATATAGTGAACCGCCA”*  
*S3-FIP “GTTTGCGAGCAAGAACAAGTGAATGTGATAGAGCCATGCC”*  
*S3-BIP “ATACAACGTGTTGTAGCTTGTACACATGACCATTCTACTCAA”*  
*S3-LPF “GGCCATAATTCTAAGCATGTTA”*  
*S3-LPB “ATTAGCTAATGAGTGTGCTCAAGTA”*

*E and N probe/primers sets for qPCR*

Primers targeting *N gene*  
*F3: AACACAAGCTTTCGGCAG,*  
*B3: GAAATTTGGATCTTTGTCATCC*

Papadakis, 2020  
*FIP: TGCGGCCAATGTTTGTAAATCAGCCAAGGAAATTTGGGGAC,*  
*BIP: CGCATTGGCATGGAAGTCACTTTGATGGCACCTGTGTAG,*  
*LF: TTCCTTGTCTGATTAGTTC,*  
*LB: ACCTTCGGGAACGTGGTT*

Rödel, 2020  
*Primers targeting a 282-bp sequence of the membrane protein (M) gene for LAMP*  
*LightMix® Modular SARS-CoV E-gene primers for qPCR*  
*Primer sequences not provided*  
*Primers targeting RdRp gene for LAMP*  
 F3 “CCGCCACTAGAGGAGCTACT”  
 F2 “ATGGGAACAAGCAAATTCTA”  
 LF “GGTGGTTGGCACAACATGTTAAAAAC”  
 FI “TTATAGTGATGTAGAAAACCTCACC”  
 B1 “TATGGGTTGGGATTATCCTAAATGTG”  
 LB “AGCCATGCCTAACATGCTTAG”  
 B2 “CCTCACTTGTTCTTGCTC”  
 B3 “TGTGTAGCTTGTCACAC”  
*Primers targeting RdRp gene for qPCR*  
 Forward “GTGAAATGGTCATGTGTGGCGG”  
 Reverse “TATGCTAATAGTGTTTTAAACATTTG”  
 Probe “CAGGTGGAACCTCATCAGGAGATGC”

Rohaim, 2020

Schermer, 2020  
*LAMP primers targeting ORF1a, ORF3a-A, ORF3a-B, ORF7a, N, and M genes*  
*Primer sequences can be found in the supplementary document of the study*  
*Primer sets orf1ab-4 and S-123 for qPCR*  
 orf1ab-F: 5'-CAGACCTCGTCTATGCTTTAAGGC-3';  
 orf1ab-R: 5'-CCCTGGTCAAGGTTAATATAGGCA-3';  
 SeF: 5'-CTCCCTCAGTCAGCACCTC-3';  
 S-R: 5'-AACCAGTGTGTGCCATTTGA-3'

Yan, 2020

Yang, 2020  
*Orf1ab and S gene primers for LAMP not found in text*  
*primer sets targeting the SARS-CoV-2 genome (AS1E targets ORF1ab, ORF1e, and N2)*  
*primers “AS1E” targeting ORF1ab gene*  
 F3 CGGTGGACAAATTGTCAC  
 B3 CTTCTCTGGATTTAACACACTT  
 Loop F TTACAAGCTTAAAGAATGTCTGAACT  
 Loop B TTGAATTTAGGTGAAACATTTGTCACG  
 FIP TCAGCACACAAAGCCAAAATTTATTTTCTGTGCAAAGGAAATTAAGGAG  
 BIP TATTGGTGGAGCTAAACTTAAAGCCTTTTCTGTACAATCCCTTTGAGTG  
*primers targeting N2 gene*  
 F3 CGGCAGTCAAGCCTCTTC  
 B3 TTGCTCTCAAGCTGGTTCAA  
*Loop F This set does not require a Loop F primer*  
 Loop B ATGGCGGTGATGCTGCTCTT  
 FIP TCCCCTACTGCTGCCTGGAGCGTTCCTCATCACGTAAGTCG  
 BIP TCTCCTGCTAGAATGGCTGGCATCTGTCAAGCAGCAGCAAAG  
*primers targeting ORF1e*  
 F3 GGCTAACTAACATCTTTGGC  
 B3 GTCAGCACACAAAGCCAA  
 Loop F TCTTCAAGCCAATCAAGGAC

*Loop B TTGTCGGTGGACAAATTGT*  
*FIP TCTCTAAGAACTCTACACCTTCCTTTTACTGTTTATGAAAACTCAAACC*  
*BIP TATCTCAACCTGTGCTTGAGAAATTTAGAAATGTCTGAACACTCTCCT*

**Supplementary Table 6. Summary of index tests and reference tests of all included studies**

| Author          | Index tests (test of interest) | Reference tests     |
|-----------------|--------------------------------|---------------------|
| Ali, 2020a      | LAMP(RNA)                      | qPCR(Superscript)   |
| Ali, 2020b      | LAMP(RNA)                      | qPCR(Superscript)   |
| Lalli, 2020b    | LAMP(direct)                   | qPCR(ThermoFisher)  |
| Kitagawa, 2020  | LAMP(RNA)                      | Unspecified         |
| Lu, 2020        | LAMP(RNA)                      | qPCR(Liferiver)     |
| Lamb, 2020a     | LAMP(RNA)                      | CDC or Luminex      |
| Lamb, 2020b     | LAMP(RNA)                      | CDC or Luminex      |
| Flynn, 2020a    | LAMP(Chelex-100)               | qPCR(Seegene)       |
| Flynn, 2020b    | LAMP(Chelex-100)               | qPCR(Seegene)       |
| Lee, 2020       | LAMP(one.step)                 | qPCR(Qiagen)        |
| Papadakis, 2020 | qcLAMP                         | qPCR(NucliSens)     |
| Rodel, 2020a    | LAMP(multiplex)                | qPCR(Seegene)       |
| Rodel, 2020b    | LAMP(multiplex)                | qPCR(Seegene)       |
| Rodel, 2020c    | LAMP(multiplex)                | qPCR(Seegene)       |
| Rodel, 2020d    | LAMP(multiplex)                | qPCR(Seegene)       |
| Rodel, 2020e    | LAMP(multiplex)                | qPCR(Seegene)       |
| Rodel, 2020f    | LAMP(multiplex)                | qPCR(Seegene)       |
| Jiang, 2020a    | LAMP(RNA)                      | qPCR(NMPA/DAAN)     |
| Jiang, 2020b    | LAMP(RNA)                      | qPCR(NMPA/DAAN)     |
| Rodel, 2020g    | LAMP(multiplex)                | qPCR(Seegene)       |
| Rodel, 2020h    | LAMP(multiplex)                | qPCR(Seegene)       |
| Rodel, 2020i    | LAMP(multiplex)                | qPCR(Seegene)       |
| Rodel, 2020j    | LAMP(multiplex)                | qPCR(Seegene)       |
| Rodel, 2020k    | LAMP(multiplex)                | qPCR(Seegene)       |
| Rodel, 2020l    | LAMP(multiplex)                | qPCR(Seegene)       |
| Rodel, 2020m    | LAMP(multiplex)                | qPCR(Seegene)       |
| Rodel, 2020n    | LAMP(multiplex)                | qPCR(Seegene)       |
| Rodel, 2020o    | LAMP(multiplex)                | qPCR(Seegene)       |
| Yan, 2020a      | LAMP(RNA)                      | qPCR(BGI)           |
| Yan, 2020b      | LAMP(RNA)                      | qPCR(BGI)           |
| Schermer, 2020a | LAMP(multiplex,direct)         | qPCR(RealStar)      |
| Schermer, 2020b | LAMP(multiplex,direct)         | qPCR(RealStar)      |
| Mohon, 2020     | LAMP(RNA)                      | qPCR(BioRad)        |
| Ben, 2020       | LAMP(direct)                   | qPCR(Seegene)       |
| Chow, 2020a     | LAMP(RNA)                      | CDC 2019-nCoV pcr   |
| Chow, 2020b     | LAMP(RNA)                      | CDC 2019-nCoV pcr   |
| Chow, 2020c     | LAMP(RNA)                      | CDC 2019-nCoV pcr   |
| Dao, 2020       | LAMP(RNA)                      | std. PCR            |
| Fowler, 2020a   | LAMP(direct)                   | qPCR(Primerdesign)  |
| Fowler, 2020b   | LAMP(RNA)                      | qPCR(Primerdesign)  |
| Fowler, 2020c   | LAMP(saliva)                   | LAMP(direct)        |
| Haq, 2020       | LAMP(RNA)                      | Unspecified         |
| Hu, 2020c       | LAMP(RNA)                      | Diagnostic criteria |
| Hu. 2020d       | LAMP(RNA)                      | Diagnostic criteria |



|                   |                               |                    |
|-------------------|-------------------------------|--------------------|
| Huang, 2020a      | LAMP(RNA)                     | qPCR(Shanghai)     |
| Huang, 2020b      | LAMP(RNA)                     | qPCR(Shanghai)     |
| Yang, 2020a       | LAMP(twostep)                 | qPCR(ThermoFisher) |
| Yang, 2020b       | LAMP(twostep)                 | qPCR(ThermoFisher) |
| Abasiyanik 2020a  | ddPCR(One-step)               | Xpert              |
| Abasiyanik 2020b  | ddPCR(One-step)               | Xpert              |
| Abasiyanik 2020c  | ddPCR(One-step)               | Xpert              |
| Abasiyanik 2020d  | ddPCR(One-step)               | Xpert              |
| Cassinari, 2020 a | ddPCR(multiplex)              | qPCR(Abbott)       |
| Cassinari , 2020b | ddPCR(multiplex)              | qPCR(Abbott)       |
| Dang. 2020b       | ddPCR                         | ABI-7500           |
| Dang. 2020c       | ddPCR                         | ABI-7500           |
| Dong, 2020a       | ddPCR                         | CDC per kits       |
| Dong, 2020b       | ddPCR                         | CDC per kits       |
| Dong, 2020c       | ddPCR                         | CDC per kits       |
| Suo, 2020         | ddPCR(low.viral)              | qPCR(BioRad)       |
| Yu. 2020a         | ddPCR                         | qPCR(Shanghai)     |
| Yu. 2020b         | ddPCR                         | qPCR(Shanghai)     |
| Yu, 2020c         | ddPCR                         | qPCR(Shanghai)     |
| Abasiyanik 2020e  | standard PCR                  | Xpert              |
| Abasiyanik 2020f  | standard PCR                  | Xpert              |
| Abasiyanik 2020g  | standard PCR                  | Xpert              |
| Abasiyanik 2020h  | standard PCR                  | Xpert              |
| Anderson, 2020    | qPCR(multiplex)               | CDC 2019-nCoV per  |
| Freire, 2020      | qPCR(nCoV-QS)                 | CDC 2019-nCoV per  |
| Garcia, 2020      | qPCR(triplex)                 | CDC 2019-nCoV per  |
| Hasan, 2020       | qPCR(direct)                  | qPCR(TaqPath)      |
| Kandel, 2020      | qPCR(saliva)                  | qPCR(BioRad)       |
| Klein, 2020       | qPCR(magnetic)                | qPCR(Qiagen)       |
| Konrad, 2020      | qPCR(kits)                    | qPCR(RealStar)     |
| Lalli, 2020a      | qPCR(CDC)                     | qPCR(ThermoFisher) |
| Lubke, 2020       | qPCR(direct)                  | qPCR(Roche)        |
| Moreno, 2020a     | qPCR(saliva)                  | qPCR(StarQ)        |
| Moreno, 2020b     | qPCR(saliva)                  | qPCR(StarQ)        |
| Pujadas, 2020     | qPCR(Cobas)                   | CDC 2019-nCoV per  |
| Ranoa, 2020       | qPCR(saliva/direct/multiplex) | qPCR(TaqPath)      |
| Ratcliff, 2020    | qPCR(nested)                  | qPCR(Altona)       |
| Sun, 2020a        | qPCR(saliva)                  | qPCR(Abbott)       |
| Sun. 2020b        | qPCR(saliva)                  | qPCR(Abbott)       |
| Vaz, 2020         | qPCR(saliva)                  | qPCR(Parana)       |
| Vogels, 2020      | qPCR(saliva/direct)           | CDC 2019-nCoV per  |
| Wang, 2020        | qPCR(nested)                  | qPCR(Sansure)      |
| Wozniak, 2020     | qPCR(aicd pH)                 | CDC 2019-nCoV per  |
| Zhen, 2020        | qPCR(multiplex)               | CDC 2019-nCoV per  |

### Supplementary Figure 1. Forest plots for LAMP, dPCR, and qPCR

Summary of the subgroup analyses for (a) LAMP, (b) dPCR, and (c) qPCR based on the number of True Positive (TP), False Positive (FP), False Negative (FN), and True Negative (TN) cases in forest plots. The lowercase letters indicate the sub-studies split from the original articles. dPCR had the most consistent diagnostic sensitivity, but least consistent in specificity because dPCR was able to detect qPCR-negative cases. qPCR had both high sensitivity and specificity. LAMP had the least sensitivity, but its specificity was the most consistent among the three tests.

(a)

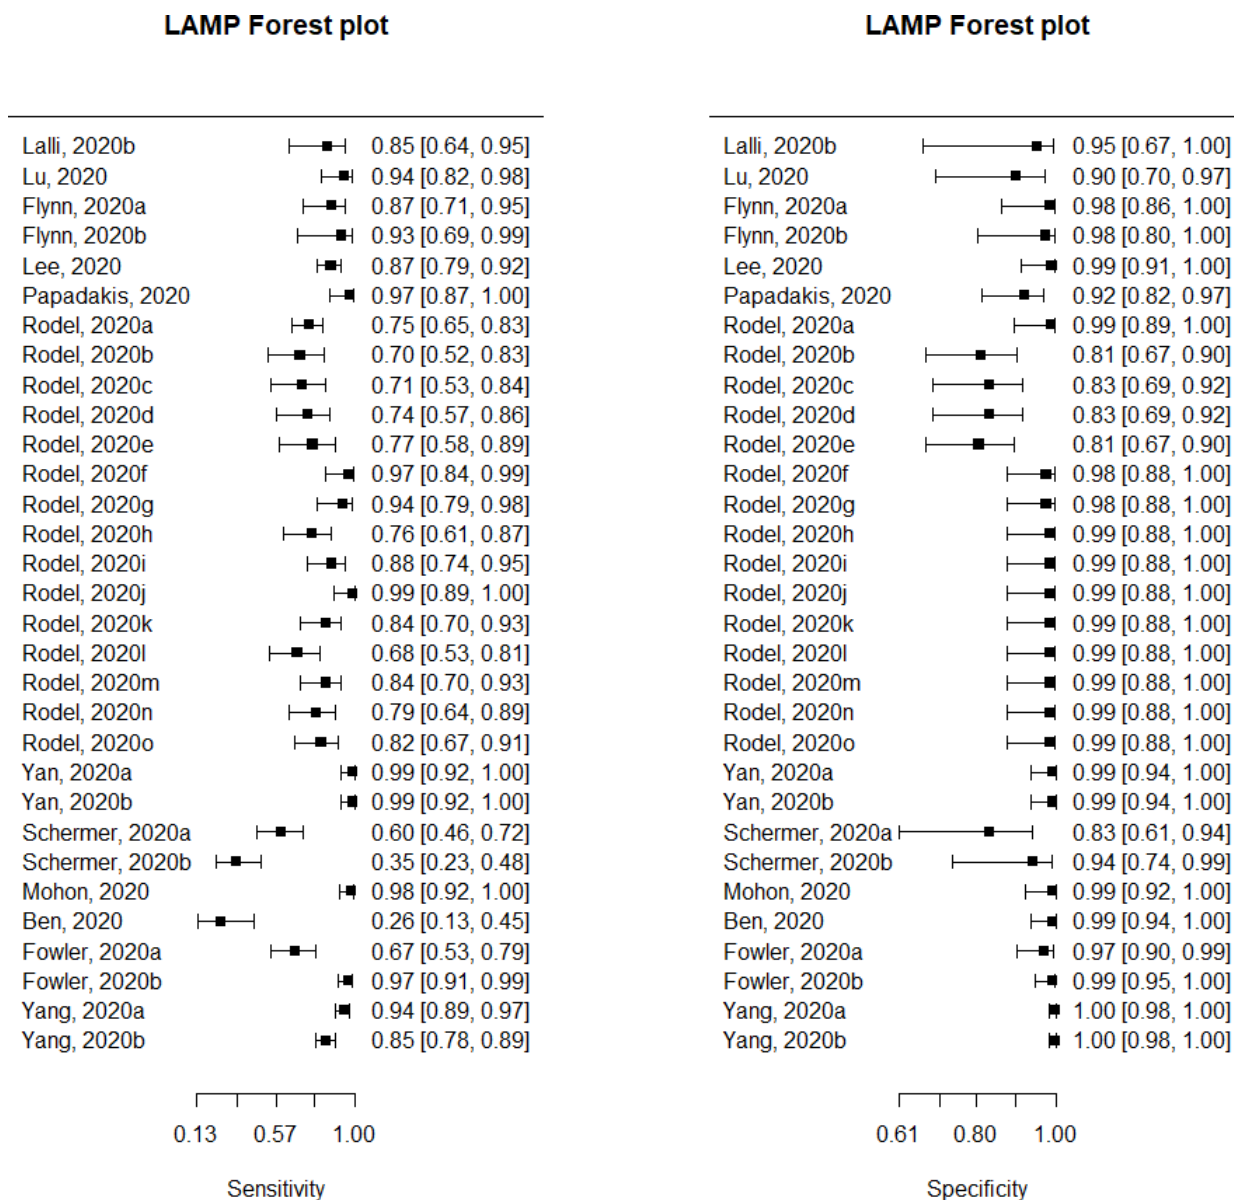

(b)

**dPCR Forest plot**

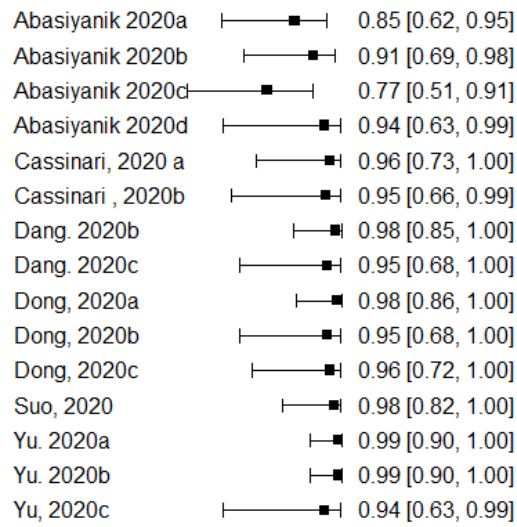

0.51 0.76 1.00

Sensitivity

**dPCR Forest plot**

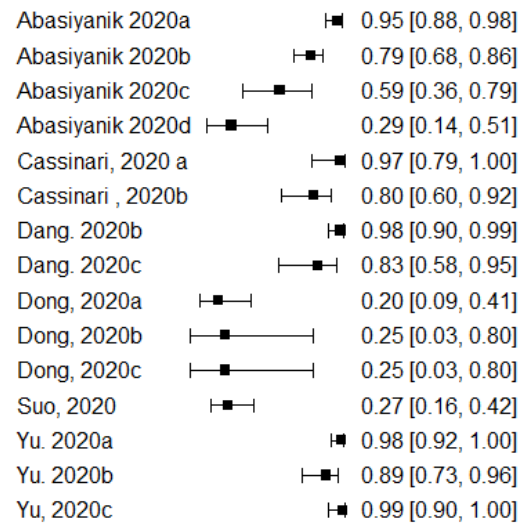

0.03 0.51 1.00

Specificity

(c)

qPCR Forest plot

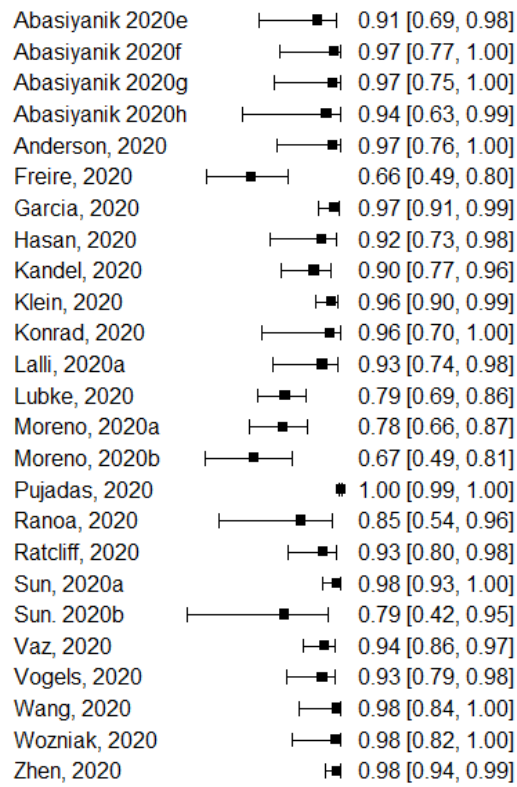

0.42 0.71 1.00

Sensitivity

qPCR Forest plot

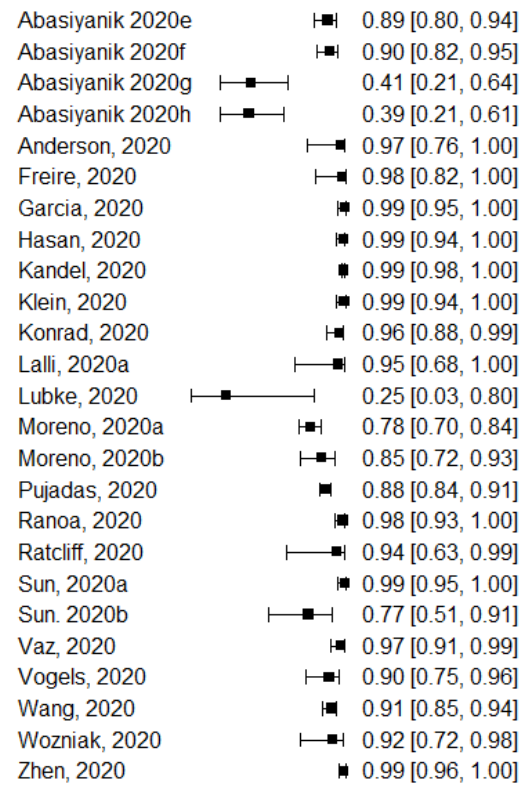

0.03 0.51 1.00

Specificity

**Supplementary Figure 2. Galaxy plots of dPCR, qPCR, and LAMP studies to visualize heterogeneity.** Each ellipse represents one study, and the red asterisk represents the summary point of all studies in one galaxy plot. Ellipses close to the red asterisk are less heterogeneous. The upper row are galaxy plots for the nucleic-acid test studies with RNA extraction and without RNA extraction. The lower row are plots for tests using different human specimens. dPCR studies were more heterogeneous than qPCR and LAMP studies overall. However, dPCR studies using saliva and sputum specimens are relatively less heterogeneous compared to those using pharyngeal swabs. Most RNA qPCR studies overlapped each other with most significant studies (larger ellipses) small studies lying close to the red asterisk, hence, resulting in small heterogeneity. Heterogeneity of qPCR studies using pharyngeal swabs (red) and saliva (green) was similar, with a few small size studies lying farther from the summary point. LAMP studies with and without RNA extraction were less sparse and were close to the summary point, implying low between-study heterogeneity. Similarly, LAMP studies using saliva and sputum were less heterogeneous.

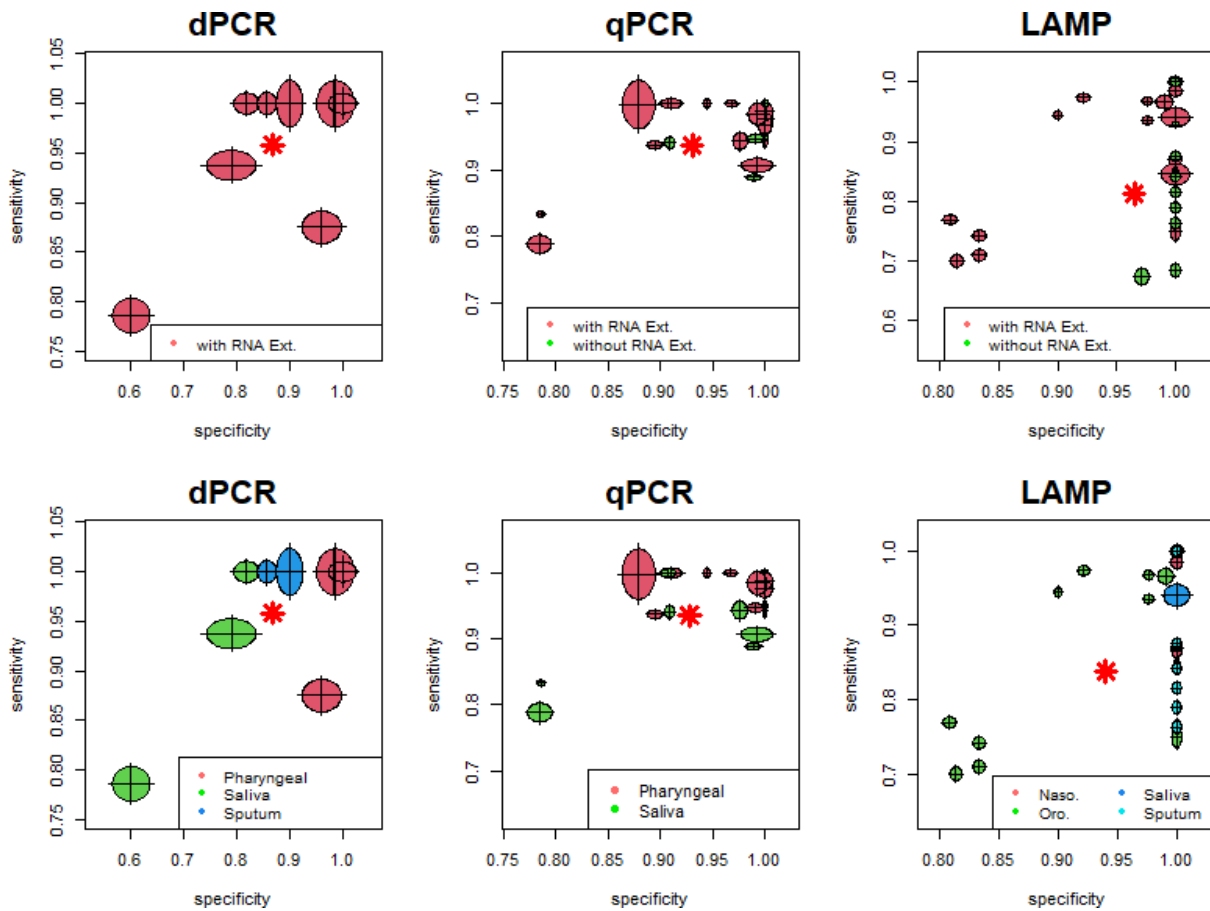

**Supplementary Figure 3. Graph of methodological quality for the 66 studies.** Applicability concerns scored higher ratings than the four risk of bias parameters due to various study designs of the studies with over 50% of the studies scored a rating of low concern in patient selection, index test, and reference standard. The overall methodological quality was fair, but the applicability concerns were deemed acceptable.

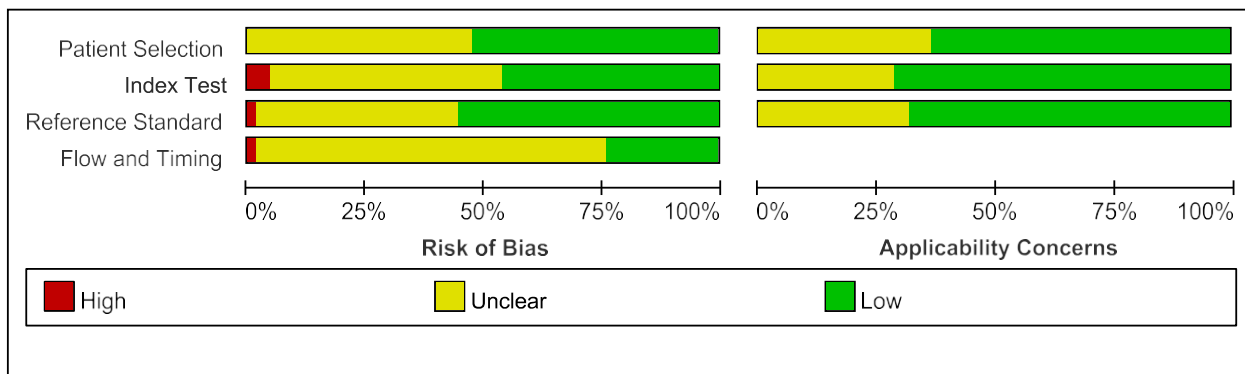

Supplement: mmc1.pdf [file mmc1.pdf]
